# Supplementary material for: Enantioselective Barbier-type allylation of ketones using allyl halide and indium in water
Source: Royal Society of Chemistry journal article supplement (doi:10.1039/c7ra01038a), 2017-01-01
Supplement: c7ra01038a1.pdf [file c7ra01038a1.pdf]

## Supporting Information

### Enantioselective Barbier-type Allylation of Ketones Using Allyl halide and Indium in Water

Shuichi Nakamura,\* Yoshichika Hara, Takashi Furukawa, Tsunehisa Hirashita

*Department of Frontier Materials, Graduate School of Engineering  
Nagoya Institute of Technology, Gokiso, Showa-ku, Nagoya 466-8555, Japan*

E-mail: snakamur@nitech.ac.jp; Tel & Fax: 81-52-735-5245

#### CONTENTS:

|                                                       |         |
|-------------------------------------------------------|---------|
| General method.....                                   | S2      |
| Optimization of reaction condition .....              | S3      |
| ESI-Mass spectroscopic analysis.....                  | S4      |
| Picture for the reaction mixture .....                | S5      |
| Characterization data for products.....               | S6-S11  |
| <sup>1</sup> H NMR analysis for reaction mixture..... | S12     |
| References.....                                       | S13     |
| <sup>1</sup> H, <sup>13</sup> C NMR Spectra.....      | S14-S25 |
| HPLC Charts.....                                      | S26-S31 |

## Experimental Section

**General method:** All reactions were performed in oven-dried glassware under a positive pressure of nitrogen. Solvents were transferred via syringe and were introduced into the reaction vessels through a rubber septum. All reactions were monitored by thin-layer chromatography (TLC) carried out on 0.25 mm Merck silica-gel (60-F254). The TLC plates were visualized with UV light and 7% phosphomolybdic acid or *p*-anisaldehyde in ethanol/heat. Column chromatography was carried out on a column packed with silica-gel 60N spherical neutral size 63-210  $\mu\text{m}$ . The  $^1\text{H}$  NMR (300 MHz),  $^{19}\text{F}$  NMR (282 MHz), and  $^{13}\text{C}$  NMR (75.5 MHz) spectra for solution in  $\text{CDCl}_3$  were recorded on Varian Mercury 300. Chemical shifts ( $\delta$ ) are expressed in ppm downfield from internal TMS HPLC analyses were performed on a JASCO LC-2000 plus using 4.6 x 250 mm CHIRALCEL<sup>®</sup> OD-H, OD-3, and OJ-H column. ESI Mass spectra were recorded on a SHIMADZU LCMS-2020 using positive mode. Optical rotations were measured on a JASCO P-2200. Infrared spectra were recorded on a JASCO FT/IR-4600 spectrometer with ZnSe ATR unit. Bis(imidazoline) catalysts were synthesized by published procedures.<sup>1)</sup>

## Optimization of reaction conditions:

### Surfactant:

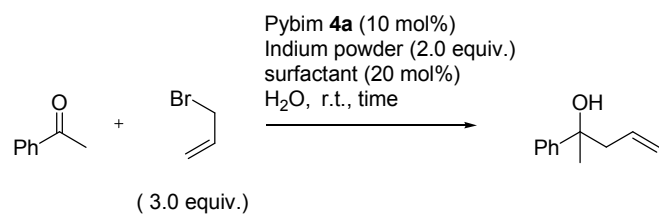

| Entry | surfactant         | Time (h) | Yield (%) | Ee (%) |
|-------|--------------------|----------|-----------|--------|
| 1     | -                  | 36       | 48        | 29     |
| 2     | SDS                | 2        | 91        | 24     |
| 3     | NH <sub>4</sub> Br | 30       | 55        | 25     |
| 4     | CTAB <sup>a</sup>  | 30       | 99        | 34     |
| 5     | 18-crown-6         | 36       | 67        | 9      |
| 6     | SDS / CTAB         | 36       | 99        | 36     |

a) CTAB : Cetrimonium bromide

### Reagent ratio:

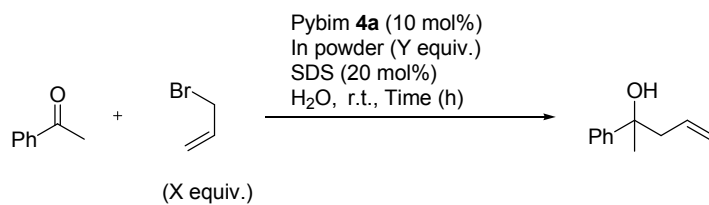

| Entry | X eq. | Y eq. | Time (h) | Yield (%) | Ee (%) |
|-------|-------|-------|----------|-----------|--------|
| 1     | 3.0   | 1.0   | 36       | 80        | 16     |
| 2     | 3.0   | 2.0   | 2        | 91        | 24     |
| 3     | 3.0   | 3.0   | 0.5      | 99        | 16     |
| 4     | 3.0   | 5.0   | 0.5      | 90        | 15     |
| ----- |       |       |          |           |        |
| 5     | 2.0   | 2.0   | 2        | 70        | 17     |

### ESI-Mass spectroscopic analysis:

In order to clarify the assumed reaction mechanism, we also investigated some other spectroscopic analysis. The ESI-Mass spectroscopic analysis of complex **A**; (**2b**, **4a**, In, and NaI in a 3:0.1:2:3 ratio in H<sub>2</sub>O, cation mode)

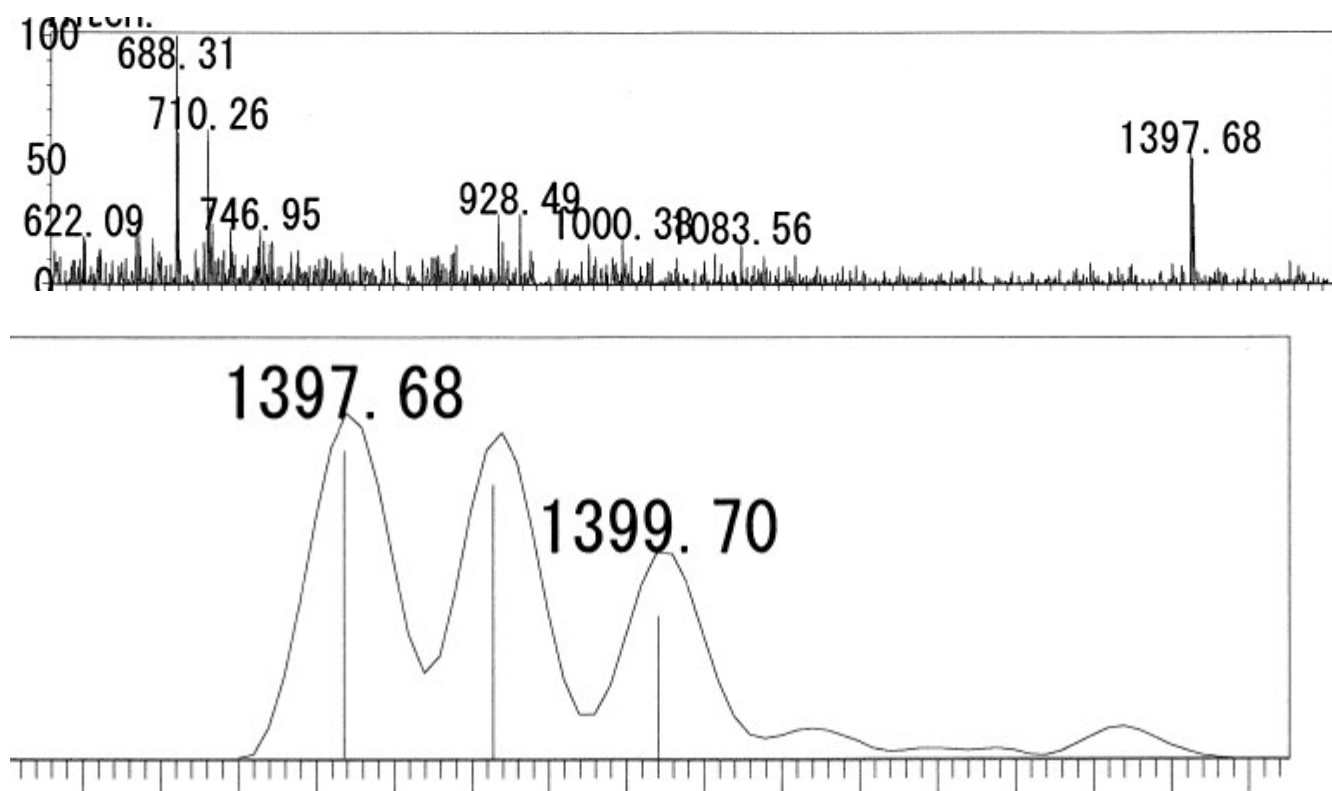

**Picture for the reaction mixture:**

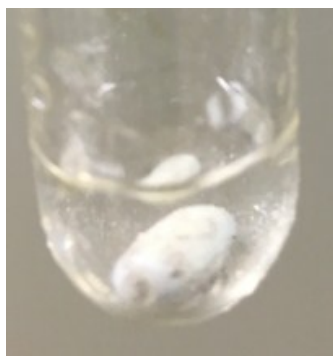

**Start**

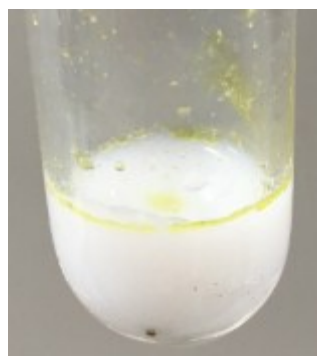

**Finish**

## Characterization data for products:

### (*R*)-2-(3-Bromophenyl)pent-4-en-2-ol (**3a**)

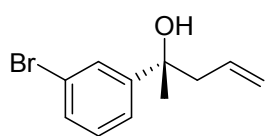

3'-Bromoacetophenone (14  $\mu$ L, 0.10 mmol) and allyl bromide (26  $\mu$ L, 0.30 mmol) were added to a solution of *t*BuCO-Pybim **4a** (6.9 mg, 0.01 mmol), indium powder (22.8 mg, 0.20 mmol), and sodium iodide (58.4 mg, 0.39 mmol) in pure water (1.0 mL) at 0 °C. After 18 h, the product was extracted with CH<sub>2</sub>Cl<sub>2</sub>, and the combined organic layer was purified through silica gel column chromatography (AcOEt/hexane =1/9) to give **3a** (25.8 mg, 99%, 86% ee) as colorless oil.

$[\alpha]_D^{25} +39.1$  (*c* 0.35, CHCl<sub>3</sub>, 86% ee) (lit.<sup>2a</sup>  $[\alpha]_D^{25} +34.1$  (*R*) (*c* 1.03, CHCl<sub>3</sub>, 89% ee)); <sup>1</sup>H NMR (300 MHz, CDCl<sub>3</sub>)  $\delta$  1.52 (s, 3H, CH<sub>3</sub>), 2.11 (s, 1H, OH), 2.44-2.25 (m, 1H, CH<sub>2</sub>), 2.62-2.69 (m, 1H, CH<sub>2</sub>), 5.13-5.17 (m, 2H, CH<sub>2</sub>), 5.56-5.64 (m, 1H, CH), 7.18-7.46 (m, 1H, *Ar*), 7.33-7.38 (m, 2H, *Ar*), 7.61 (s, 1H, *Ar*); <sup>13</sup>C NMR (75.5 MHz, CDCl<sub>3</sub>)  $\delta$  29.9, 48.4, 73.3, 105.0, 120.1, 122.6, 123.5, 128.2, 129.8, 129.8, 133.1, 150.1; HPLC (DAICEL CHIRALCEL OD-H, hexane:*i*PrOH = 97:3, 1.0 mL/min)  $t_R = 8.1$  min (minor),  $t_R = 9.2$  min (major).

### (*R*)-2-Phenylpent-4-en-2-ol (**3b**)

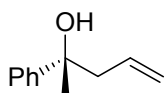

Acetophenone (12  $\mu$ L, 0.10 mmol) and allyl bromide (26  $\mu$ L, 0.30 mmol) were added to a solution of *t*BuCO-Pybim **4a** (6.9 mg, 0.01 mmol), indium powder (22.8 mg, 0.20 mmol), and sodium iodide (58.4 mg, 0.39 mmol) in pure water (1.0 mL) at 0 °C. After 18 h, the product was extracted with CH<sub>2</sub>Cl<sub>2</sub>, and the combined organic layer was purified through silica gel column chromatography (AcOEt/hexane =1/9) to give **3b** (13.7 mg, 86%, 65% ee) as colorless oil.

$[\alpha]_D^{25} +26.7$  (*c* 0.48, CHCl<sub>3</sub>, 70% ee) (lit.<sup>2b</sup>  $[\alpha]_D^{25} +37.6$  (*R*) (*c* 1.52, CHCl<sub>3</sub>, 82% ee)); <sup>1</sup>H NMR (300 MHz, CDCl<sub>3</sub>)  $\delta$  1.55 (s, 3H, CH<sub>3</sub>), 2.08 (s, 1H, OH), 2.50-2.54 (m, 1H, CH<sub>2</sub>), 2.69-2.73 (m, 1H, CH<sub>2</sub>), 5.11-5.17 (m, 2H, CH<sub>2</sub>), 5.58-5.66 (m, 1H, CH), 7.25-7.26 (m, 1H, *Ar*), 7.27-7.35 (m, 2H, *Ar*), 7.37-7.56 (m, 2H, *Ar*); <sup>13</sup>C NMR (75.5 MHz, CDCl<sub>3</sub>)  $\delta$  29.9, 48.4, 73.6, 119.6, 124.7, 126.6, 128.2, 133.6, 147.6; HPLC (DAICEL CHIRALCEL OJ-H, hexane:*i*PrOH = 97:3, 1.0 mL/min)  $t_R = 10$  min (major),  $t_R = 12$  min (minor).

### (R)-2-(3-Fluorophenyl)pent-4-en-2-ol (3c)

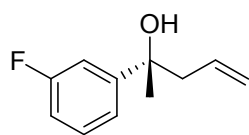

3'-Fluoroacetophenone (12  $\mu$ L, 0.10 mmol) and allyl bromide (26  $\mu$ L, 0.30 mmol) were added to a solution of *t*BuCO-Pybim **4a** (6.9 mg, 0.01 mmol), indium powder (22.8 mg, 0.20 mmol), and sodium iodide (58.4 mg, 0.39 mmol) in pure water (1.0 mL) at 0 °C. After 18 h, the product was extracted with CH<sub>2</sub>Cl<sub>2</sub>, and the combined organic layer was purified through silica gel column chromatography (AcOEt/hexane =1/9) to give **3c** (16.0 mg, 89%, 80% ee) as colorless oil.

$[\alpha]_{\text{D}}^{25} +40.0$  (*c* 0.41, CHCl<sub>3</sub>, 80% ee) (lit.<sup>2c</sup>  $[\alpha]_{\text{D}}^{25} -54.9$  (*S*) (*c* 1.2, CHCl<sub>3</sub>, 97% ee)); <sup>1</sup>H NMR (300 MHz, CDCl<sub>3</sub>)  $\delta$  1.53 (s, 3H, CH<sub>3</sub>), 2.14 (s, 1H, OH), 2.44-2.52 (m, 1H, CH<sub>2</sub>), 2.63-2.70 (m, 1H, CH<sub>2</sub>), 5.12-5.17 (m, 2H, CH<sub>2</sub>), 5.56-5.61 (m, 1H, CH), 6.90-6.95 (m, 1H, *Ar*), 7.17-7.19 (m, 2H, *Ar*), 7.20-7.31 (m, 1H, *Ar*); <sup>13</sup>C NMR (75.5 MHz, CDCl<sub>3</sub>)  $\delta$  29.9, 48.3, 73.4, 112.0 (d, *J* = 15.0 Hz), 113.3 (d, *J* = 14.1 Hz), 120.3 (d, *J* = 1.7 Hz), 129.6 (d, *J* = 5.6 Hz), 133.2, 150.5 (d, *J* = 4.5 Hz), 161.3, 164.5; HPLC (DAICEL CHIRALCEL OJ-H, hexane:*i*PrOH = 97:3, 1.0 mL/min)  $t_{\text{R}}$  = 8.2 min (major),  $t_{\text{R}}$  = 8.6 min (minor).

### (R)-2-(3-Chlorophenyl)pent-4-en-2-ol (3d)

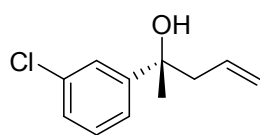

3'-Chloroacetophenone (13  $\mu$ L, 0.10 mmol) and allyl bromide (26  $\mu$ L, 0.30 mmol) were added to a solution of *t*BuCO-Pybim **4a** (6.9 mg, 0.01 mmol), indium powder (22.8 mg, 0.20 mmol), and sodium iodide (58.4 mg, 0.39 mmol) in pure water (1.0 mL) at 0 °C. After 48 h, the product was extracted with CH<sub>2</sub>Cl<sub>2</sub>, and the combined organic layer was purified through silica gel column chromatography (AcOEt/hexane =5/95) to give **3d** (13.5 mg, 76%, 76% ee) as colorless oil.

$[\alpha]_{\text{D}}^{25} +51.2$  (*c* 0.20, CHCl<sub>3</sub>, 76% ee) (lit.<sup>2b</sup>  $[\alpha]_{\text{D}}^{25} +41.6$  (*R*) (*c* 1.18, CHCl<sub>3</sub>, 82% ee)); <sup>1</sup>H NMR (300 MHz, CDCl<sub>3</sub>)  $\delta$  1.53 (s, 3H, CH<sub>3</sub>), 2.09 (s, 1H, OH), 2.44-2.52 (m, 1H, CH<sub>2</sub>), 2.62-2.69 (m, 1H, CH<sub>2</sub>), 5.13-5.17 (m, 2H, CH<sub>2</sub>), 5.53-5.64 (m, 1H, CH), 7.73-7.29 (m, 3H, *Ar*), 7.45 (s, 1H, *Ar*); <sup>13</sup>C NMR (75.5 MHz, CDCl<sub>3</sub>)  $\delta$  29.9, 48.3, 73.4, 120.0, 123.0, 125.3, 126.8, 129.4, 133.1, 134.2, 149.8; HPLC (DAICEL CHIRALCEL OD-H, hexane:*i*PrOH = 97:3, 1.0 mL/min)  $t_{\text{R}}$  = 8.6 min (minor),  $t_{\text{R}}$  = 9.3 min (major).

### (R)-2-(3-Iodophenyl)pent-4-en-2-ol (3e)

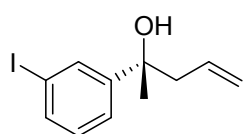

3'-Iodoacetophenone (15  $\mu$ L, 0.10 mmol) and allyl bromide (26  $\mu$ L, 0.30 mmol) were added to a solution of *t*BuCO-Pybim **4a** (6.9 mg, 0.01 mmol), indium powder (22.8 mg, 0.20 mmol), and sodium iodide (58.4 mg, 0.39 mmol) in pure water (1.0 mL) at 0 °C. After 18 h, the product was extracted with CH<sub>2</sub>Cl<sub>2</sub>, and the combined organic layer was

purified through silica gel column chromatography (AcOEt/hexane =5/95) to give **3e** (31.2 mg, 99%, 89% ee) as colorless oil.

$[\alpha]_D^{25} +25.6$  (*c* 0.41, CHCl<sub>3</sub>, 89% ee); <sup>1</sup>H NMR (300 MHz, CDCl<sub>3</sub>) δ 1.51 (s, 3H, CH<sub>3</sub>), 2.13 (s, 1H, OH), 2.45-2.50 (m, 1H, CH<sub>2</sub>), 2.61-2.67 (m, 1H, CH<sub>2</sub>), 5.12-5.16 (m, 2H, CH<sub>2</sub>), 5.55-5.64 (m, 1H, CH), 7.06 (dd, *J* = 7.5, 7.8 Hz, 2H, *Ar*), 7.37 (d, *J* = 7.5 Hz, 1H, *Ar*), 7.57 (d, *J* = 7.8 Hz, 1H, *Ar*), 7.81 (s, 1H, *Ar*); <sup>13</sup>C NMR (75.5 MHz, CDCl<sub>3</sub>) δ 29.9, 48.4, 73.2, 94.6, 120.1, 124.2, 130.0, 133.1, 134.1, 135.7, 150.1; IR (ATR) 3540, 3431, 3073, 3000, 2976, 2929, 1687, 1060, 957, 916, 698 cm<sup>-1</sup>; MS (ESI) Calcd for C<sub>11</sub>H<sub>13</sub>INO (M+Na) 310.9909; Found 310.9893; HPLC (DAICEL CHIRALPAK IA, hexane:*i*PrOH = 97:3, 1.0 mL/min) *t*<sub>R</sub> = 8.9 min (major), *t*<sub>R</sub> = 9.7 min (minor).

### (*R*)-2-(2-Bromophenyl)pent-4-en-2-ol (**3f**)

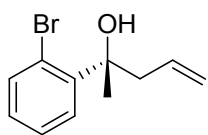

2'-Bromoacetophenone (13 μL, 0.10 mmol) and allyl bromide (26 μL, 0.30 mmol) were added to a solution of *t*BuCO-Pybim **4a** (6.9 mg, 0.01 mmol), indium powder (22.8 mg, 0.20 mmol), and sodium iodide (58.4 mg, 0.39 mmol) in pure water (1.0 mL) at 0 °C. After 48 h, the product was extracted with CH<sub>2</sub>Cl<sub>2</sub>, and the combined organic layer was purified through silica gel column chromatography (AcOEt/hexane =5/95) to give **3f** (9.7 mg, 40%, 59% ee) as colorless oil.

$[\alpha]_D^{25} +25.0$  (*c* 0.21, CHCl<sub>3</sub>, 59% ee) (lit.<sup>2d</sup>  $[\alpha]_D^{25} -35.7$  (*S*) (*c* 1.34, CHCl<sub>3</sub>, 97% ee)); <sup>1</sup>H NMR (300 MHz, CDCl<sub>3</sub>) δ 1.66 (s, 3H, CH<sub>3</sub>), 2.68 (s, 1H, OH), 2.68-2.68 (m, 1H, CH<sub>2</sub>), 3.28-3.32 (m, 1H, CH<sub>2</sub>), 5.11-5.48 (m, 2H, CH<sub>2</sub>), 5.51-5.59 (m, 1H, CH), 7.09-7.13 (m, 1H, *Ar*), 7.28-7.33 (m, 1H, *Ar*), 7.60 (d, *J* = 9.0 Hz, 1H, *Ar*), 7.71 (d, *J* = 9.6 Hz, 1H, *Ar*); <sup>13</sup>C NMR (75.5 MHz, CDCl<sub>3</sub>) δ 27.2, 45.9, 74.6, 119.4, 120.0, 127.4, 128.3, 128.6, 133.6, 135.0, 145.0; HPLC (DAICEL CHIRALPAK AD-3, hexane:*i*PrOH = 97:3, 1.0 mL/min) *t*<sub>R</sub> = 8.1 min (major), *t*<sub>R</sub> = 9.6 min (minor).

### (*R*)-2-(4-Bromophenyl)pent-4-en-2-ol (**3g**)

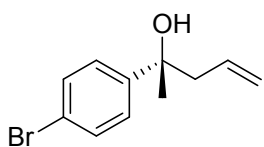

4'-Bromoacetophenone (19.9 mg, 0.10 mmol) and allyl bromide (26 μL, 0.30 mmol) were added to a solution of *t*BuCO-Pybim **4a** (6.9 mg, 0.01 mmol), indium powder (22.8 mg, 0.20 mmol), and sodium iodide (58.4 mg, 0.39 mmol) in pure water (1.0 mL) at 0 °C. After 48 h, the product was extracted with CH<sub>2</sub>Cl<sub>2</sub>, and the combined organic layer was purified through silica gel column chromatography (AcOEt/hexane =5/95) to give **3g** (19.1 mg, 78%, 65% ee) as colorless oil.



$[\alpha]_{\text{D}}^{25} +14.8$  ( $c$  0.30,  $\text{CHCl}_3$ , 65% ee) (lit.<sup>2d</sup>  $[\alpha]_{\text{D}}^{25} -53.6$  ( $S$ ) ( $c$  1.5,  $\text{CHCl}_3$ , 97% ee));  $^1\text{H}$  NMR (300 MHz,  $\text{CDCl}_3$ )  $\delta$  1.52 (s, 3H,  $\text{CH}_3$ ), 2.06 (s, 1H,  $\text{OH}$ ), 2.43-2.51 (m, 1H,  $\text{CH}_2$ ), 2.61-2.68 (m, 1H,  $\text{CH}_2$ ), 5.11-5.15 (m, 2H,  $\text{CH}_2$ ), 5.52-5.63 (m, 1H,  $\text{CH}$ ), 7.31 (d,  $J = 8.7$  Hz, 2H,  $\text{Ar}$ ), 7.45 (d,  $J = 8.7$  Hz, 2H,  $\text{Ar}$ );  $^{13}\text{C}$  NMR (75.5 MHz,  $\text{CDCl}_3$ )  $\delta$  29.9, 48.3, 73.4, 120.0, 120.6, 126.7, 131.2, 133.2, 146.7; HPLC (DAICEL CHIRALCEL OJ-H, hexane:*i*PrOH = 97:3, 1.0 mL/min)  $t_{\text{R}} = 12.0$  min (major),  $t_{\text{R}} = 13.5$  min (minor).

### (*R*)-2-(3-Methoxyphenyl)pent-4-en-2-ol (**3h**)

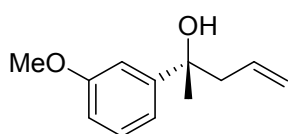

3'-Methoxyacetophenone (14  $\mu\text{L}$ , 0.10 mmol) and allyl bromide (26  $\mu\text{L}$ , 0.30 mmol) were added to a solution of *t*BuCO-Pybim **4a** (6.9 mg, 0.01 mmol), indium powder (22.8 mg, 0.20 mmol), and sodium iodide (58.4 mg, 0.39 mmol) in pure water (1.0 mL) at 0  $^{\circ}\text{C}$ . After 48 h, the product was extracted with  $\text{CH}_2\text{Cl}_2$ , and the combined organic layer was purified through silica gel column chromatography (AcOEt/hexane =5/95) to give **3h** (17.6 mg, 92%, 74% ee) as colorless oil.

$[\alpha]_{\text{D}}^{25} +40.1$  ( $c$  0.41,  $\text{CHCl}_3$ , 74% ee) (lit.<sup>2a</sup>  $[\alpha]_{\text{D}}^{25} +44.8$  ( $R$ ) ( $c$  1.02,  $\text{CHCl}_3$ , 93% ee));  $^1\text{H}$  NMR (300 MHz,  $\text{CDCl}_3$ )  $\delta$  1.53 (s, 3H,  $\text{CH}_3$ ), 2.10 (s, 1H,  $\text{OH}$ ), 2.45-2.52 (m, 1H,  $\text{CH}_2$ ), 2.65-2.72 (m, 1H,  $\text{CH}_2$ ), 5.82 (s, 3H,  $\text{CH}_3$ ), 5.12-5.17 (m, 2H,  $\text{CH}$ ), 5.58-5.64 (m, 1H,  $\text{CH}$ ), 6.77-6.99 (m, 1H,  $\text{Ar}$ ), 7.01-7.03 (m, 2H,  $\text{Ar}$ ), 7.25-7.29 (m, 1H,  $\text{Ar}$ );  $^{13}\text{C}$  NMR (75.5 MHz,  $\text{CDCl}_3$ )  $\delta$  28.8, 48.3, 73.6, 111.0, 111.7, 117.2, 119.5, 192.2, 133.6, 149.5, 159.4; HPLC (DAICEL CHIRALCEL OJ-H, hexane:*i*PrOH = 97:3, 1.0 mL/min)  $t_{\text{R}} = 14.8$  min (major),  $t_{\text{R}} = 17.5$  min (minor).

### (*R*)-2-(3-Methylphenyl)pent-4-en-2-ol (**3i**)

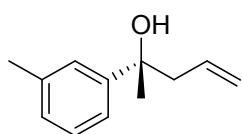

3'-Methylacetophenone (14  $\mu\text{L}$ , 0.10 mmol) and allyl bromide (26  $\mu\text{L}$ , 0.3 mmol) were added to a solution of *t*BuCO-Pybim **4a** (6.9 mg, 0.01 mmol), indium powder (22.8 mg, 0.20 mmol), and sodium iodide (58.4 mg, 0.39 mmol) in pure water (1.0 mL) at 0  $^{\circ}\text{C}$ . After 18 h, the product was extracted with  $\text{CH}_2\text{Cl}_2$ , and the combined organic layer was purified through silica gel column chromatography (AcOEt/hexane =5/95) to give **3i** (14.0 mg, 80%, 84% ee), as colorless oil.

$[\alpha]_{\text{D}}^{25} +39.6$  ( $c$  0.19,  $\text{CHCl}_3$ , 84% ee) (lit.<sup>2a</sup>  $[\alpha]_{\text{D}}^{25} +34.1$  ( $R$ ) ( $c$  0.86,  $\text{CHCl}_3$ , 51% ee));  $^1\text{H}$  NMR (300 MHz,  $\text{CDCl}_3$ )  $\delta$  1.54 (s, 3H,  $\text{CH}_3$ ), 2.06 (s, 1H,  $\text{OH}$ ), 2.46 (s, 3H,  $\text{CH}_3$ ), 2.48-2.53 (m, 1H,  $\text{CH}_2$ ), 2.65-2.72 (m, 1H,  $\text{CH}_2$ ), 5.12-5.17 (m, 2H,  $\text{CH}$ ), 5.56-5.69 (m, 1H,  $\text{CH}$ ), 7.06 (s, 1H,  $\text{Ar}$ ), 7.22-7.27 (m, 3H,  $\text{Ar}$ );  $^{13}\text{C}$  NMR (75.5 MHz,  $\text{CDCl}_3$ )  $\delta$  21.6, 28.8, 48.4, 73.6, 119.4, 121.8, 125.5, 127.3, 128.1, 133.8,

137.7, 147.6; HPLC (DAICEL CHIRALCEL OJ-H, hexane:*i*PrOH = 97:3, 1.0 mL/min)  $t_R$  = 7.7 min (major),  $t_R$  = 8.8 min (minor).

### (*R*)-2-(Thiophen-3-yl)pent-4-en-2-ol (**3j**)

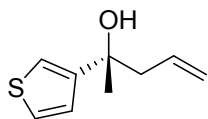

3-Acetylthiophen (12.6 mg, 0.10 mmol) and allyl bromide (26  $\mu$ L, 0.30 mmol) were added to a solution of *t*BuCO-Pybim **4a** (6.9 mg, 0.01 mmol), indium powder (22.8 mg, 0.20 mmol), and sodium iodide (58.4 mg, 0.39 mmol) in pure water (1.0 mL) at 0 °C. After 24 h, the product was extracted with CH<sub>2</sub>Cl<sub>2</sub>, and the combined organic layer was purified through silica gel column chromatography (AcOEt/hexane =5/95) to give **3j** (15.2 mg, 90%, 55% ee) as colorless oil.

$[\alpha]_D^{25}$  +20.3 (*c* 0.24, CHCl<sub>3</sub>, 55% ee) (lit.<sup>2d</sup>  $[\alpha]_D^{25}$  -49.4 (*S*) (*c* 0.99, CHCl<sub>3</sub>, 99% ee)); <sup>1</sup>H NMR (300 MHz, CDCl<sub>3</sub>)  $\delta$  1.54 (s, 3H, CH<sub>3</sub>), 2.08 (s, 1H, OH), 2.46-2.53 (m, 1H, CH<sub>2</sub>), 2.61-2.68 (m, 1H, CH<sub>2</sub>), 5.12-5.16 (m, 2H, CH), 5.63-5.68 (m, 1H, CH), 7.07 (s, 1H, *Ar*), 7.16-7.17 (m, 1H, *Ar*), 7.26-7.29 (m, 1H, *Ar*); <sup>13</sup>C NMR (75.5 MHz, CDCl<sub>3</sub>)  $\delta$  29.5, 48.3, 72.7, 119.4, 119.5, 125.6, 125.9, 133.6; HPLC (DAICEL CHIRALCEL OD-3, hexane:*i*PrOH = 99:1, 0.8 mL/min)  $t_R$  = 20.0 min (major),  $t_R$  = 21.5 min (minor).

### (*R*)-2-(Naphthalen-2-yl)pent-4-en-2-ol (**3k**)

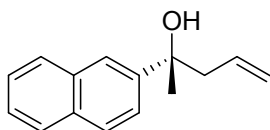

2-Acetonaphthone (17.0 mg, 0.10 mmol) and allyl bromide (26  $\mu$ L, 0.30 mmol) were added to a solution of *t*BuCO-Pybim **4a** (6.9 mg, 0.01 mmol), indium powder (22.8 mg, 0.20 mmol), and sodium iodide (58.4 mg, 0.39 mmol) in pure water (1.0 mL) at 0 °C. After 24 h, the product was extracted with CH<sub>2</sub>Cl<sub>2</sub>, and the combined organic layer was purified through silica gel column chromatography (AcOEt/hexane =5/95) to give **3k** (19.9 mg, 94%, 71% ee) as colorless oil.

$[\alpha]_D^{25}$  +47.2 (*c* 0.54, CHCl<sub>3</sub>, 71% ee) (lit.<sup>2b</sup>  $[\alpha]_D^{25}$  -39.8 (*S*) (*c* 0.92, CHCl<sub>3</sub>, 84% ee)); <sup>1</sup>H NMR (300 MHz, CDCl<sub>3</sub>)  $\delta$  1.64 (s, 3H, CH<sub>3</sub>), 2.20 (s, 1H, OH), 2.59-2.62 (m, 1H, CH<sub>2</sub>), 2.80-2.83 (m, 1H, CH<sub>2</sub>), 5.10-5.19 (m, 2H, CH), 5.60-5.63 (m, 1H, CH), 7.48-7.55 (m, 3H, *Ar*), 7.84-7.92 (m, 4H, *Ar*); <sup>13</sup>C NMR (75.5 MHz, CDCl<sub>3</sub>)  $\delta$  30.0, 48.4, 73.8, 119.6, 121.7, 123.2, 123.5, 125.7, 126.1, 1127.5, 147.9, 128.1, 132.2, 133.2, 133.6, 145.0; HPLC (DAICEL CHIRALCEL OJ-H, hexane:*i*PrOH = 97:3, 1.0 mL/min)  $t_R$  = 24.2 min (minor),  $t_R$  = 26.8 min (major).

**(R)-1,1,1-Trifluoro-2-phenylpent-4-en-2-ol (31)**

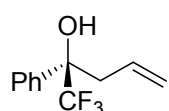

2,2,2-Trifluoroacetophenone (14  $\mu$ L, 0.10 mmol) and allyl bromide (26  $\mu$ L, 0.30 mmol) were added to a solution of *t*BuCO-Pybim **4a** (6.9 mg, 0.01 mmol), indium powder (22.8 mg, 0.20 mmol), and sodium iodide (58.4 mg, 0.39 mmol) in pure water (1.0 mL) at 0  $^{\circ}$ C.

After 18 h, the product was extracted with  $\text{CH}_2\text{Cl}_2$ , and the combined organic layer was purified through silica gel column chromatography (AcOEt/hexane =1/9) to give **31** (16.4 mg, 77%, 86% ee) as colorless oil.

$[\alpha]_{\text{D}}^{25} +46.2$  (*c* 0.15, Benzene, 86% ee), (lit.<sup>2c</sup>  $[\alpha]_{\text{D}}^{25} -46.0$  (*S*) (*c* 0.34, Benzene, 70% ee));  $^1\text{H}$  NMR (300 MHz,  $\text{CDCl}_3$ )  $\delta$  2.61 (s, 1H, OH), 2.83-2.88 (m, 1H,  $\text{CH}_2$ ), 2.96-3.02 (m, 1H,  $\text{CH}_2$ ), 5.21-5.28 (m, 2H, CH), 5.49-5.60 (m, 1H, CH), 7.25-7.41 (m, 3H, Ar), 7.56-7.59 (m, 2H, Ar);  $^{13}\text{C}$  NMR (75.5 MHz,  $\text{CDCl}_3$ )  $\delta$  40.3, 122.1, 123.4, 126.4, 127.2, 128.4, 128.6, 130.4, 163.8; HPLC (DAICEL CHIRALCEL OJ-H, hexane:*i*PrOH = 97:3, 1.0 mL/min)  $t_{\text{R}} = 15.8$  min (major),  $t_{\text{R}} = 19.9$  min (minor).

### $^1\text{H}$ NMR analysis for reaction mixture:

In order to clarify the allylindium intermediate, we investigated NMR analysis.  $^1\text{H}$  NMR spectrum of the allyl bromide in  $\text{D}_2\text{O}$  showed a peak on 3.90 ppm (**spectrum 1**), and the mixture of allyl bromide, indium, NaI and pybim **2a** in  $\text{D}_2\text{O}$  showed new peak on 2.85 ppm (**spectrum 2**).

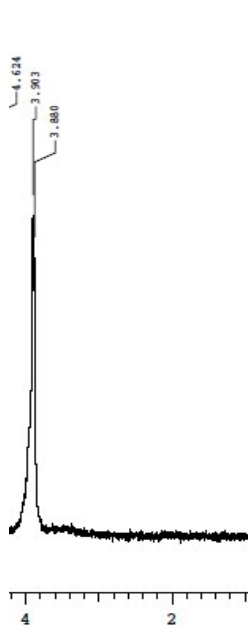

**spectrum 1**

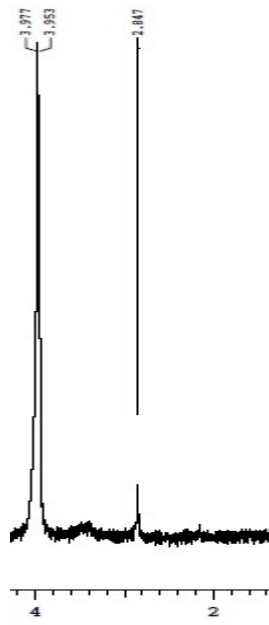

**spectrum 2**

## References

- 1) a) S. Nakamura, M. Ohara, Y. Nakamura, N. Shibata, T. Toru, *Chem. Eur. J.* **2010**, *16*, 2360–2362; b) M. Ohara, Y. Hara, T. Ohnuki, S. Nakamura, *Chem. Eur. J.* **2014**, *20*, 8848–8851.
- 2) a) X.-R. Huang, C. Chen, G.-H. Lee, S.-M. Peng, *Adv. Synth. Catal.* **2009**, *351*, 3089–3095; b) Y.-C. Teo, J.-D. Goh, T.-P. Loh, *Org. Lett.* **2005**, *7*, 2743–2745; c) T.-P. Loh, J.-R. Zhou X.-R. Li, *Tetrahedron Lett.* **1999**, *40*, 9333–9336; d) D. S. Barnett, P. N. Moquist, S. E. Schaus, *Angew. Chem. Int. Ed.* **2009**, *48*, 8679–8682.

# $^1\text{H}$ and $^{13}\text{C}$ NMR

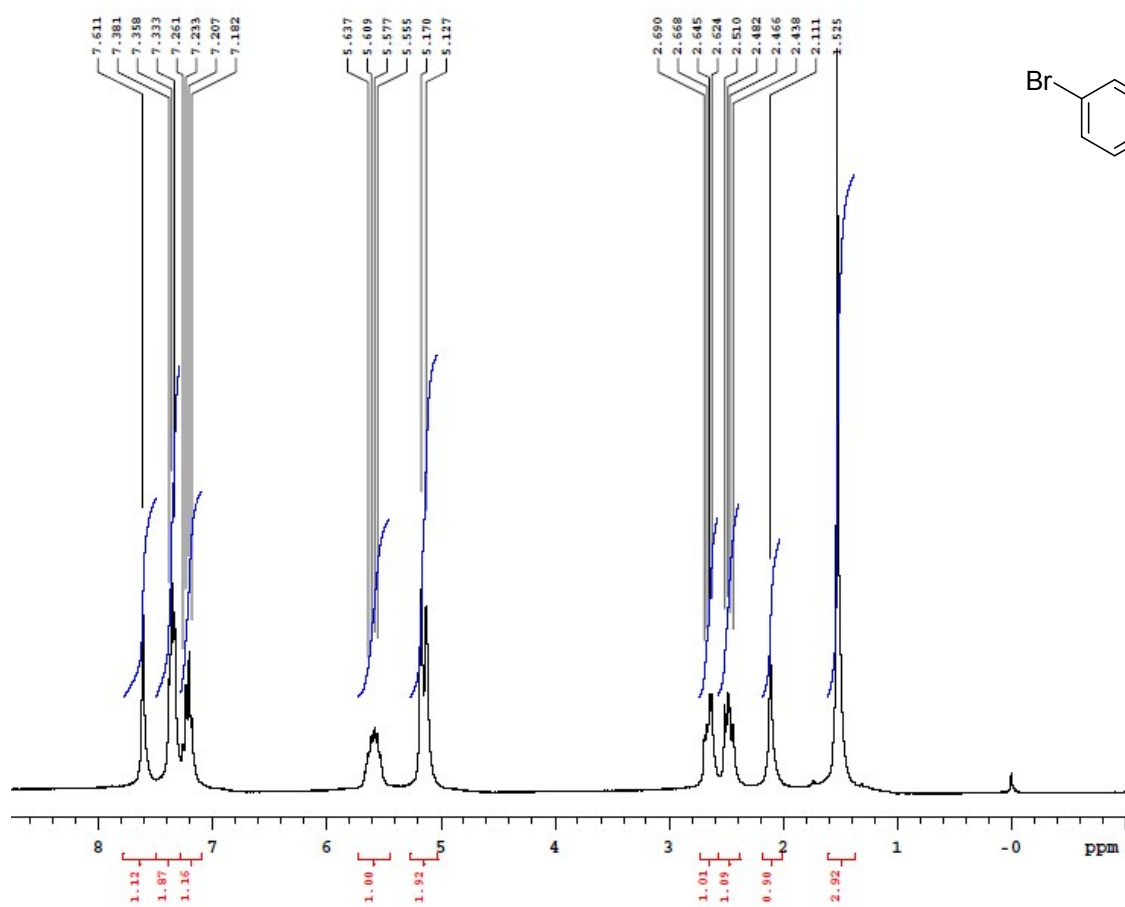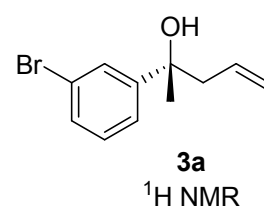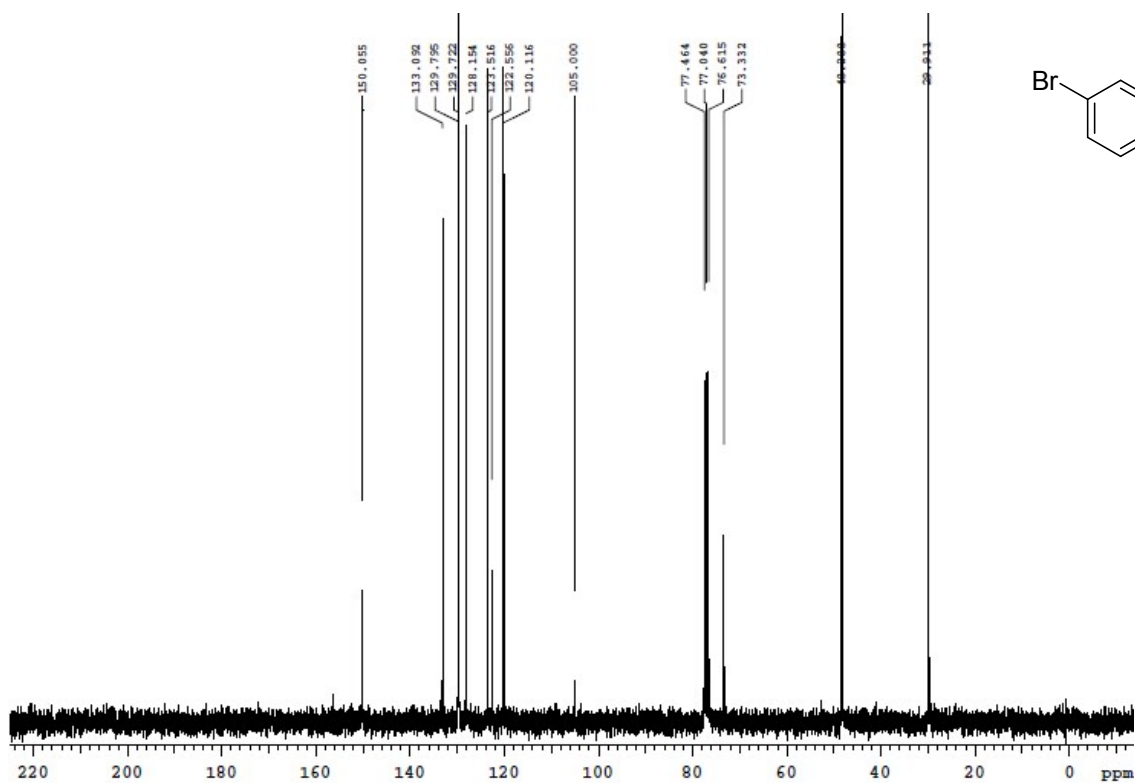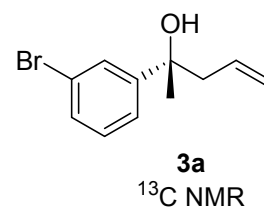

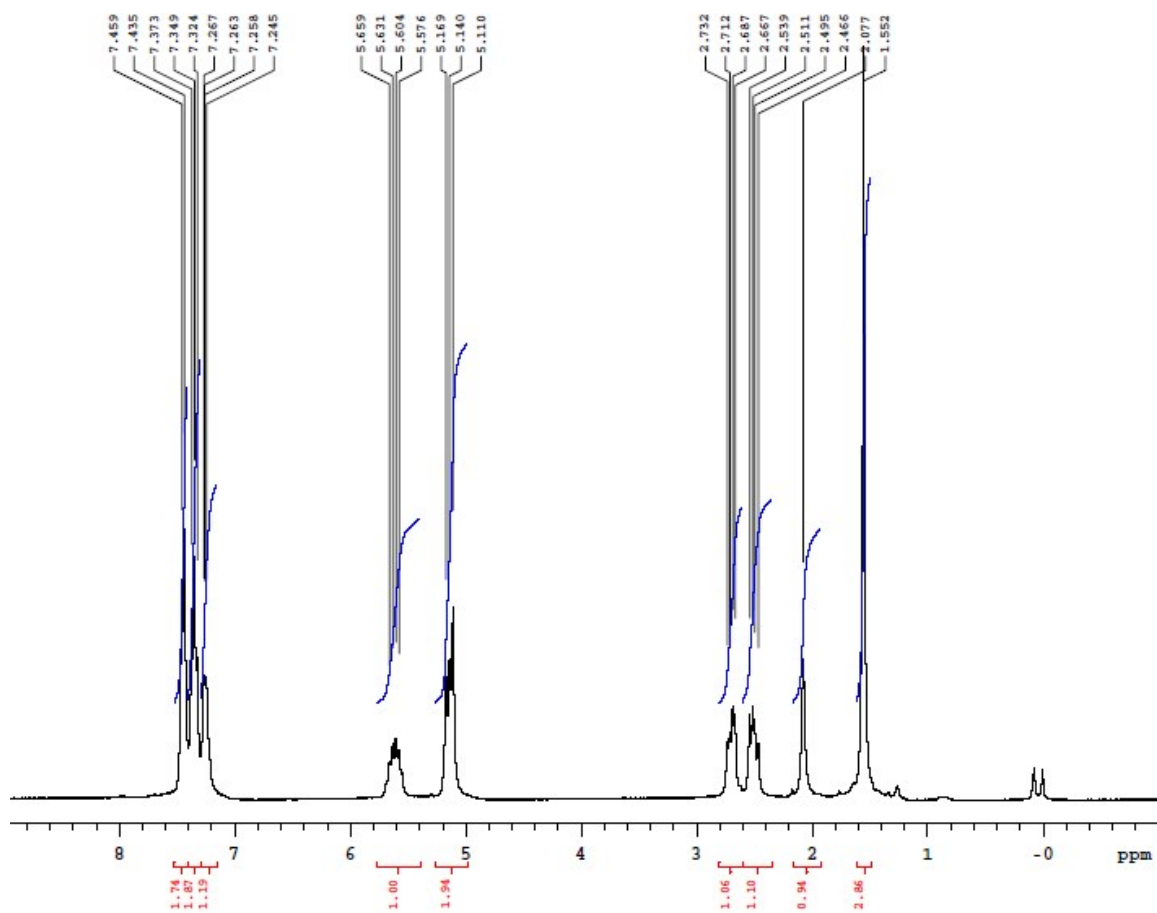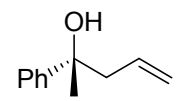

**3b**  
<sup>1</sup>H NMR

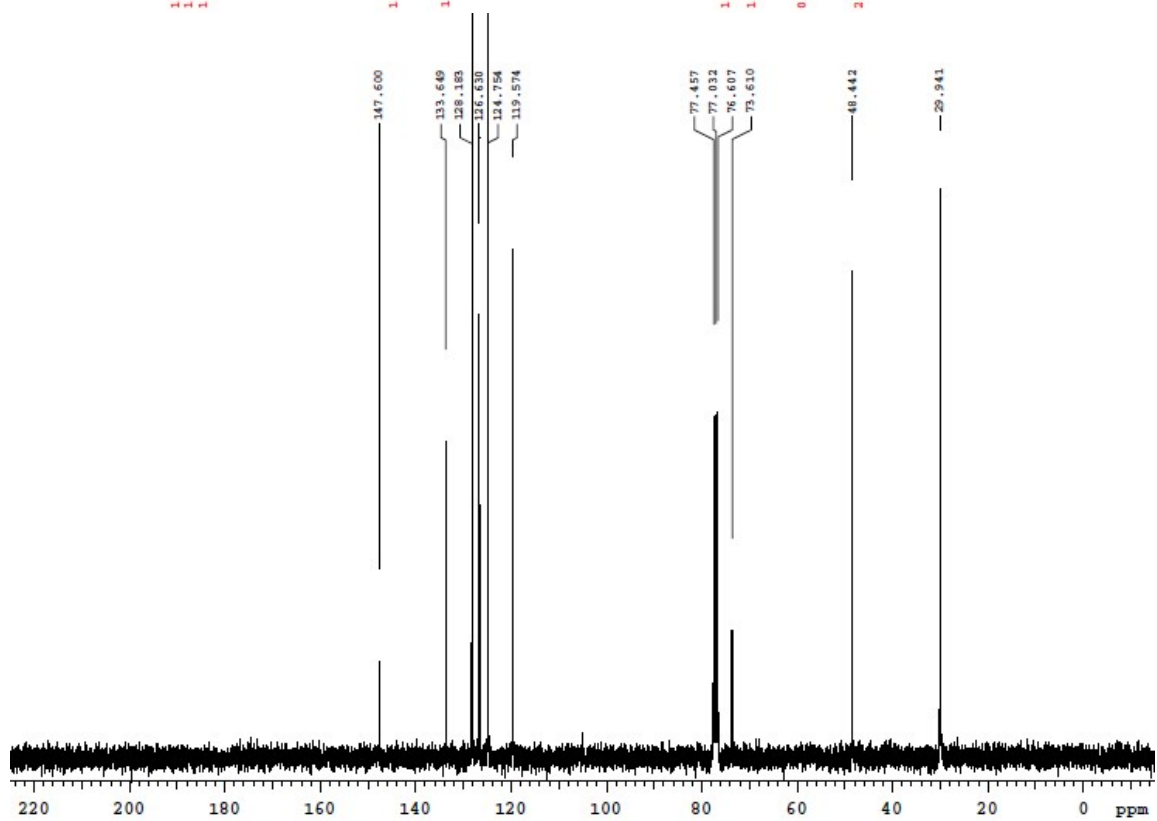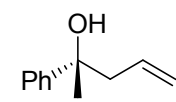

**3b**  
<sup>13</sup>C NMR

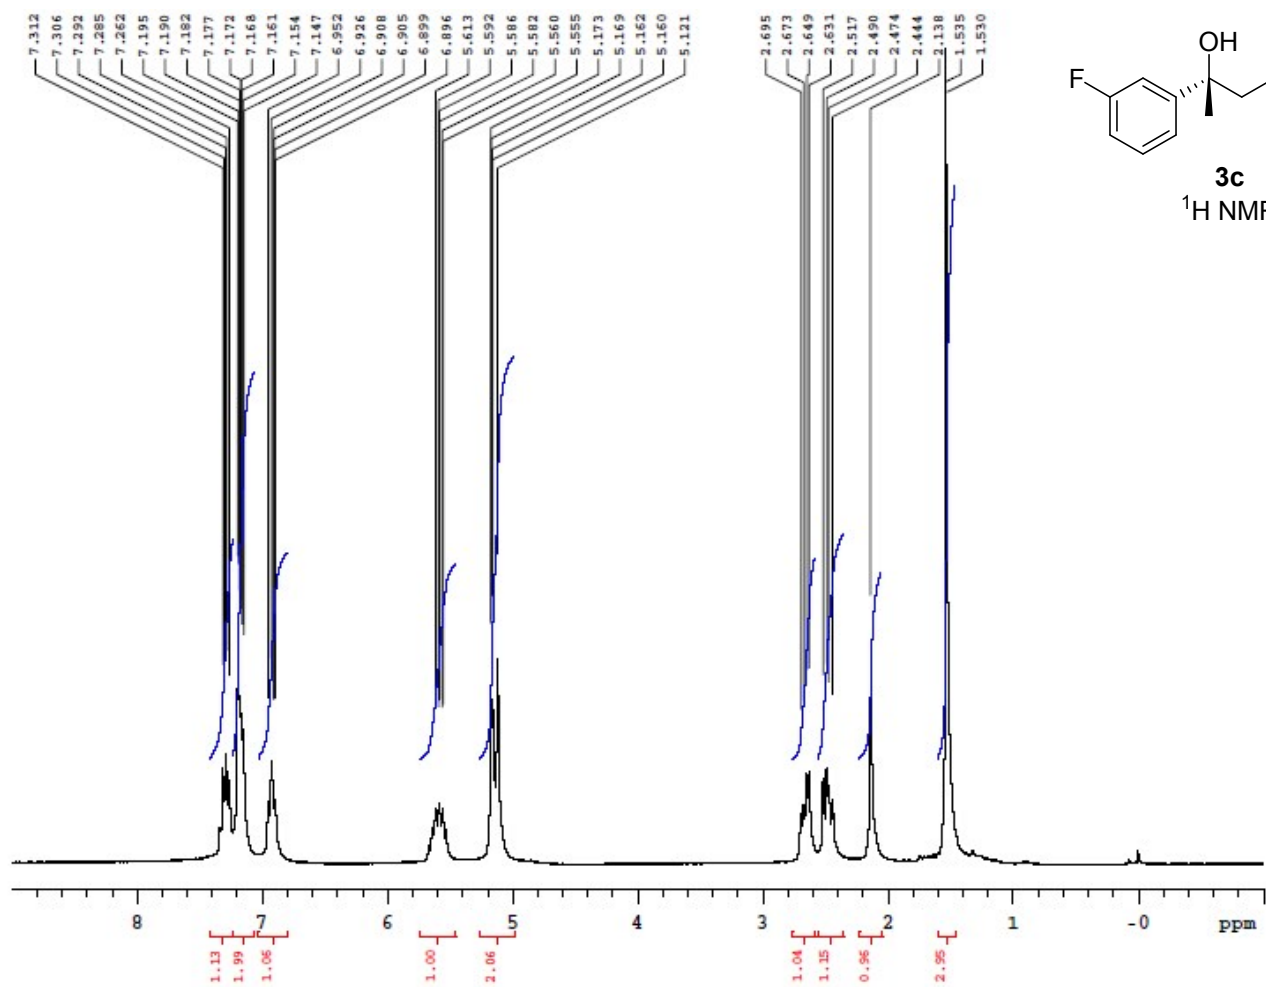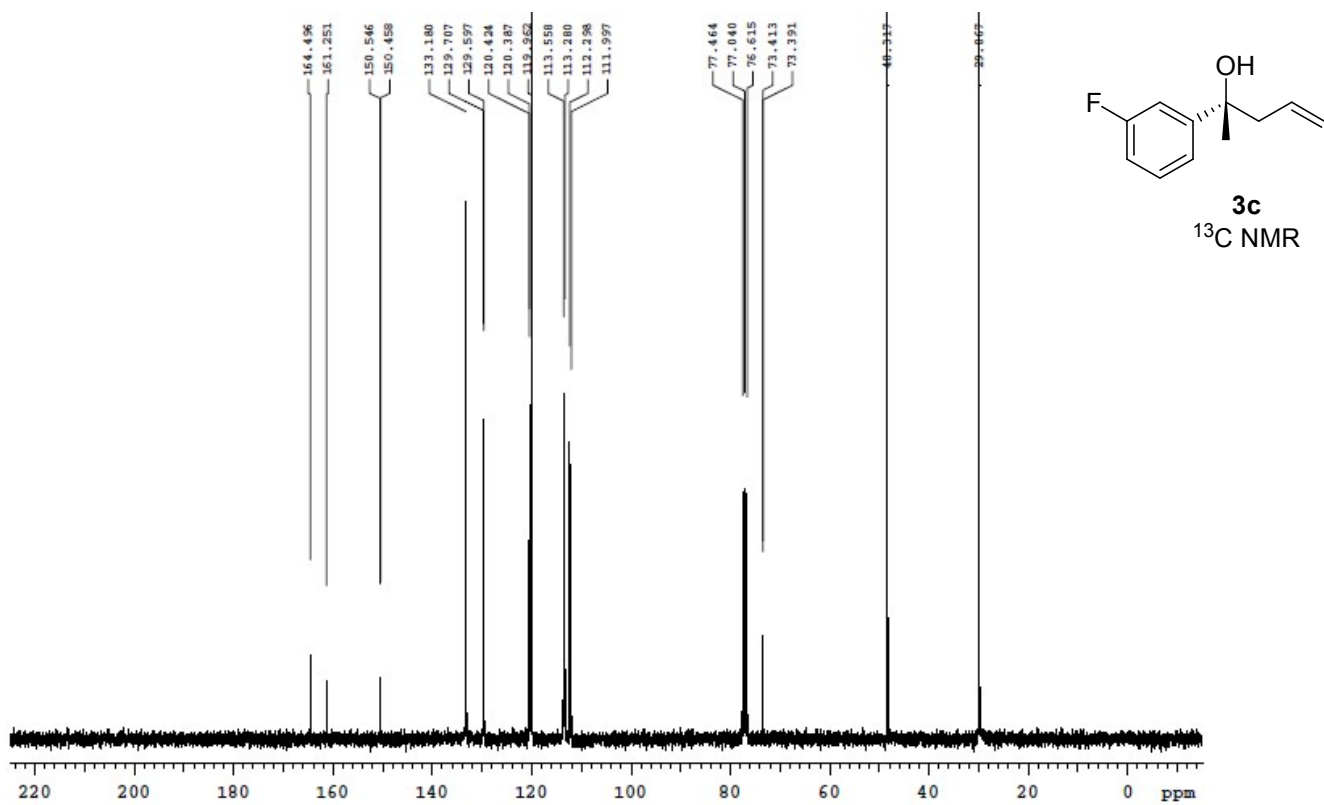



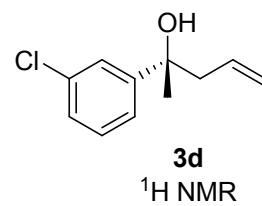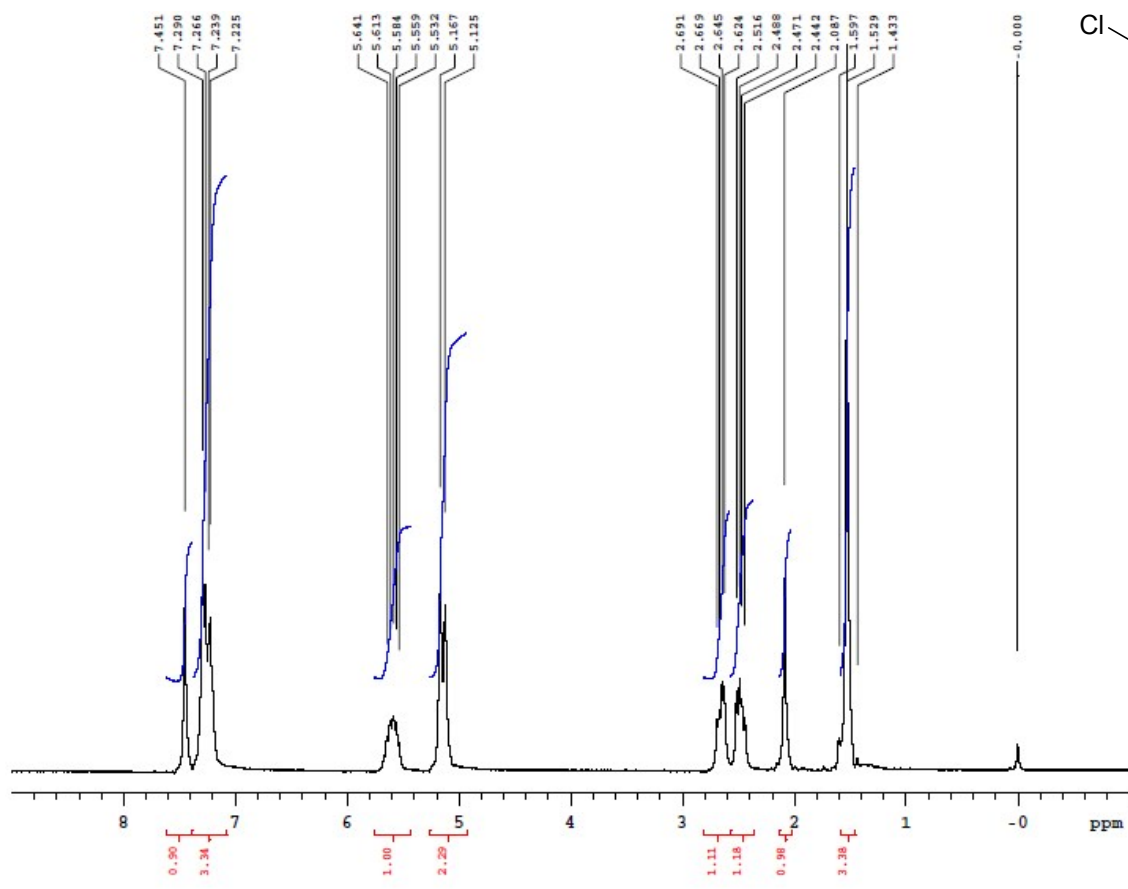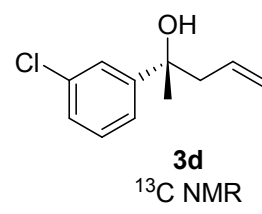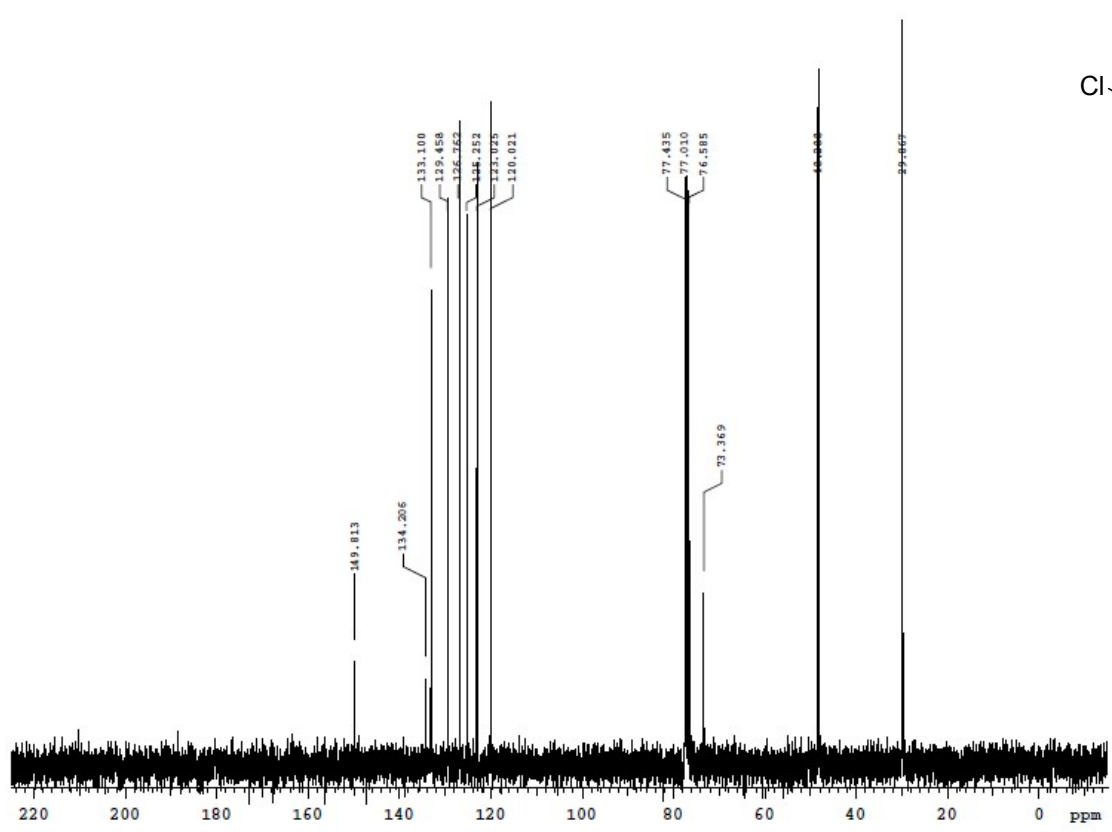

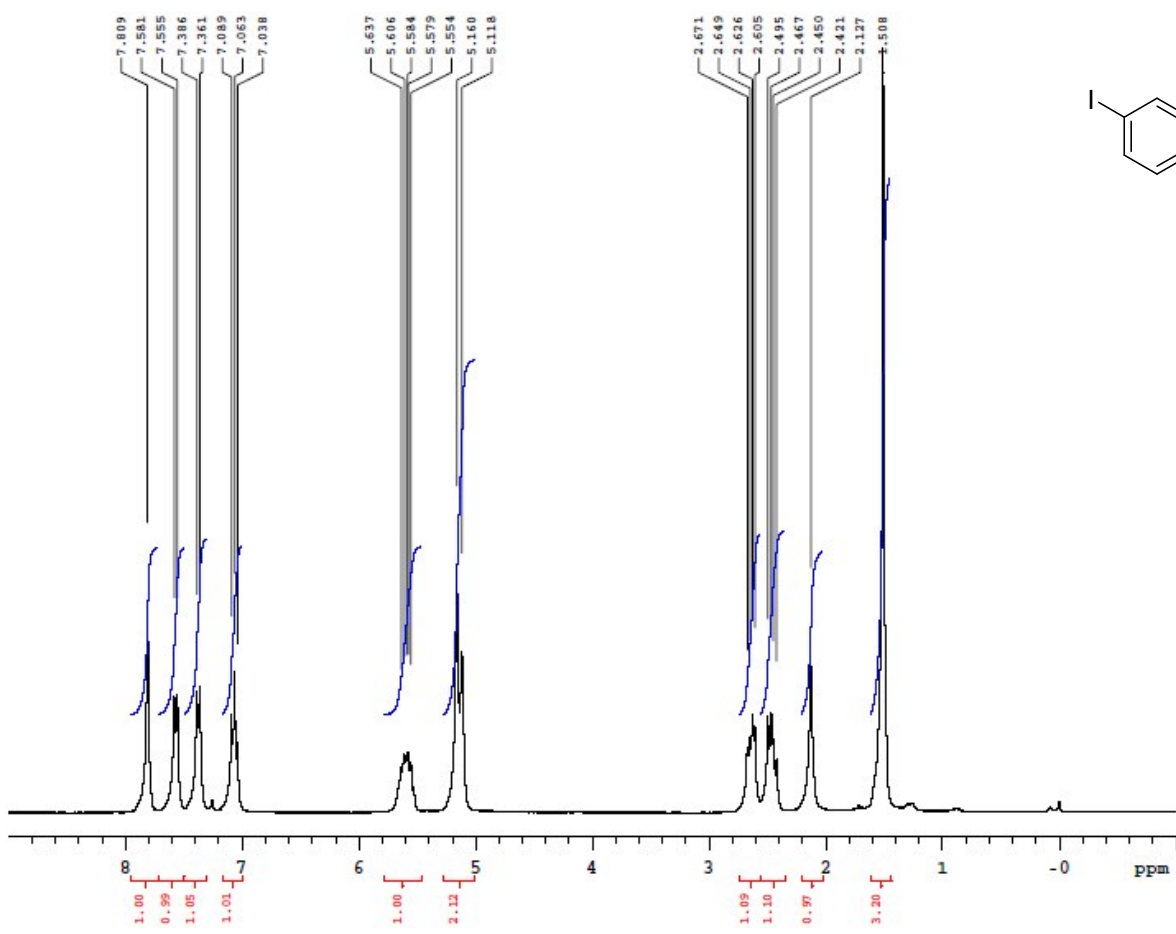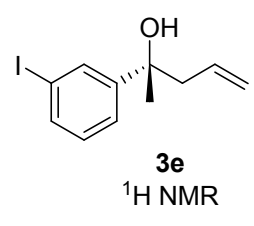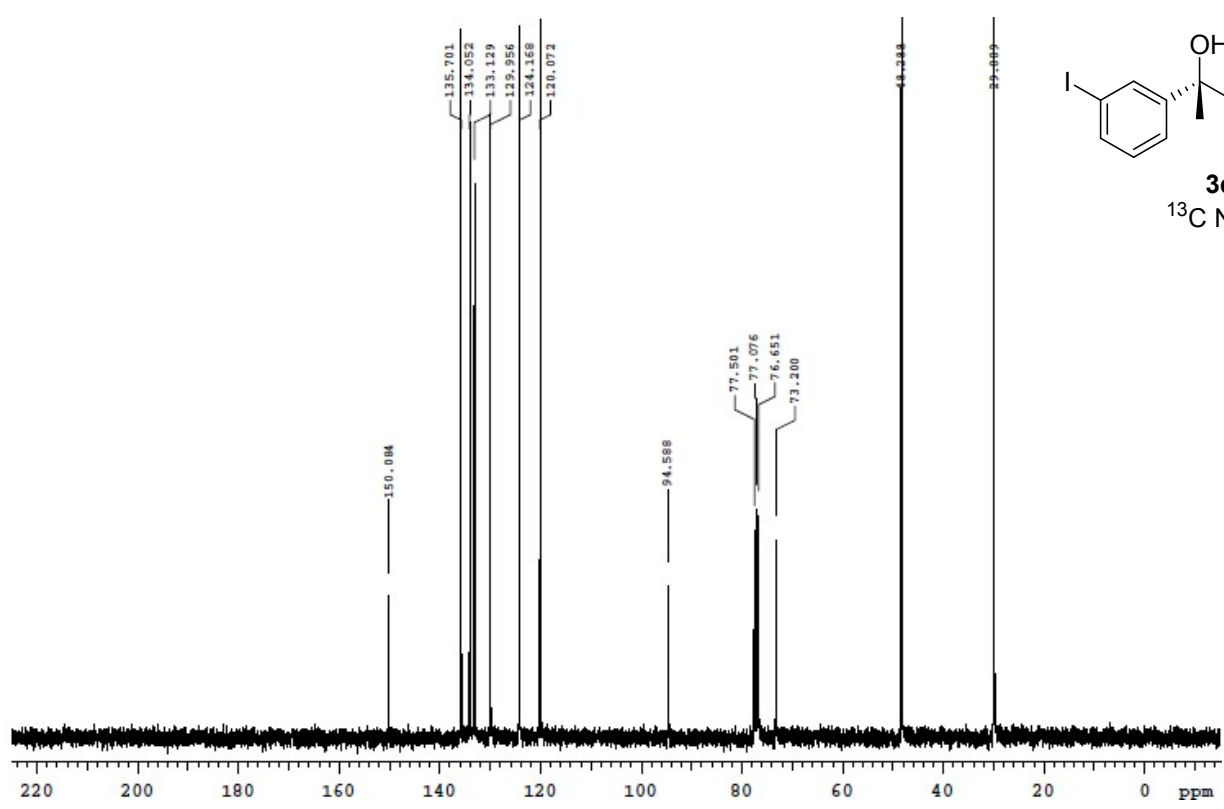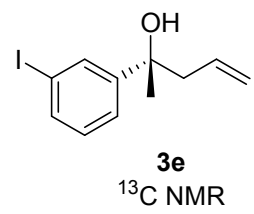

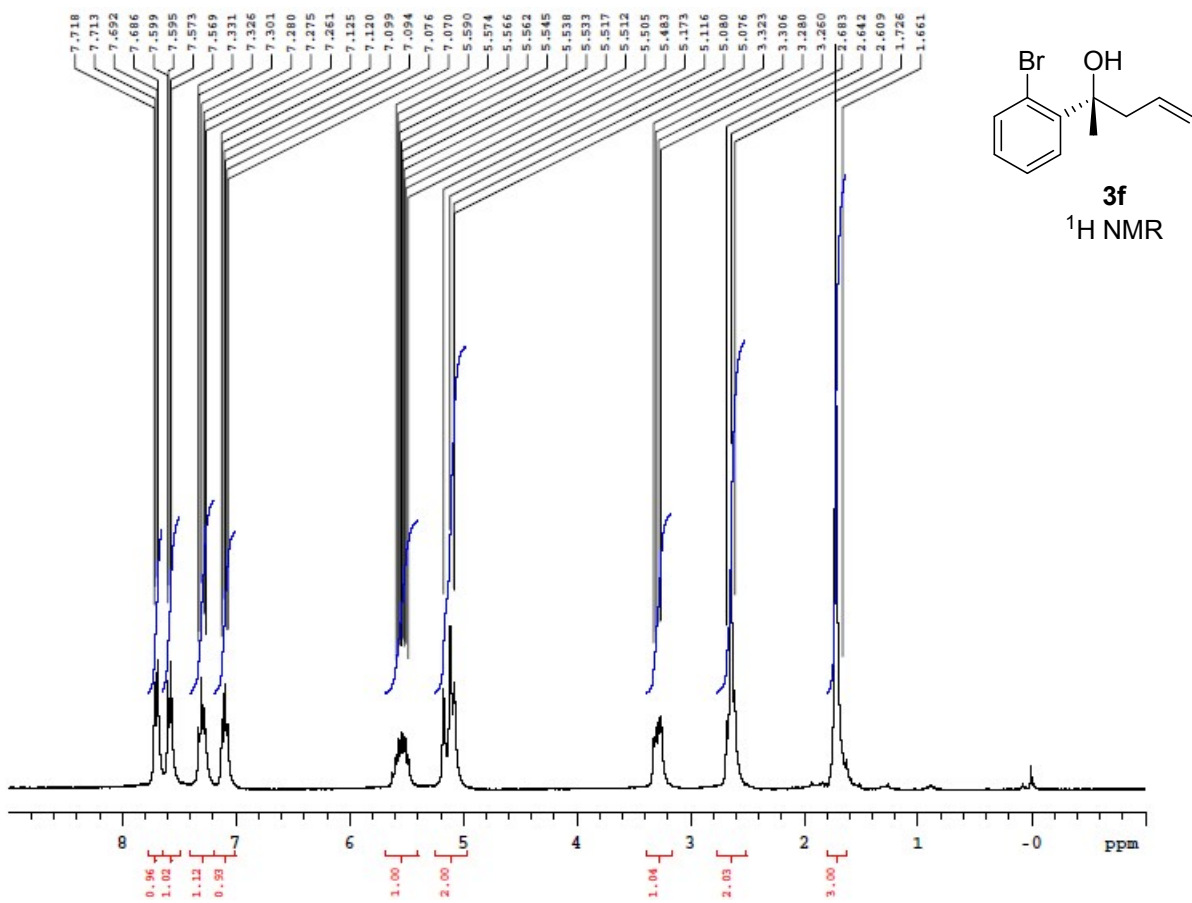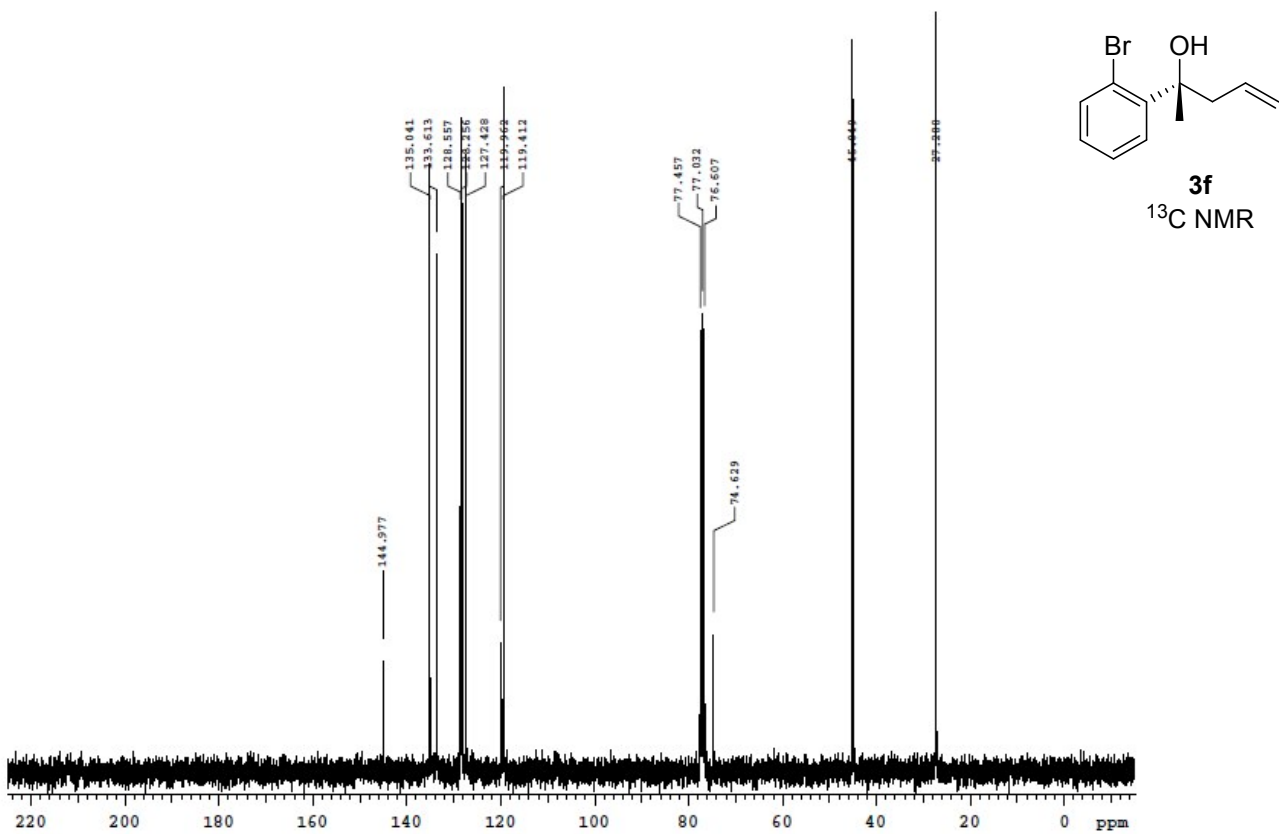

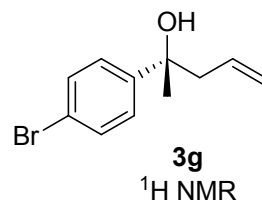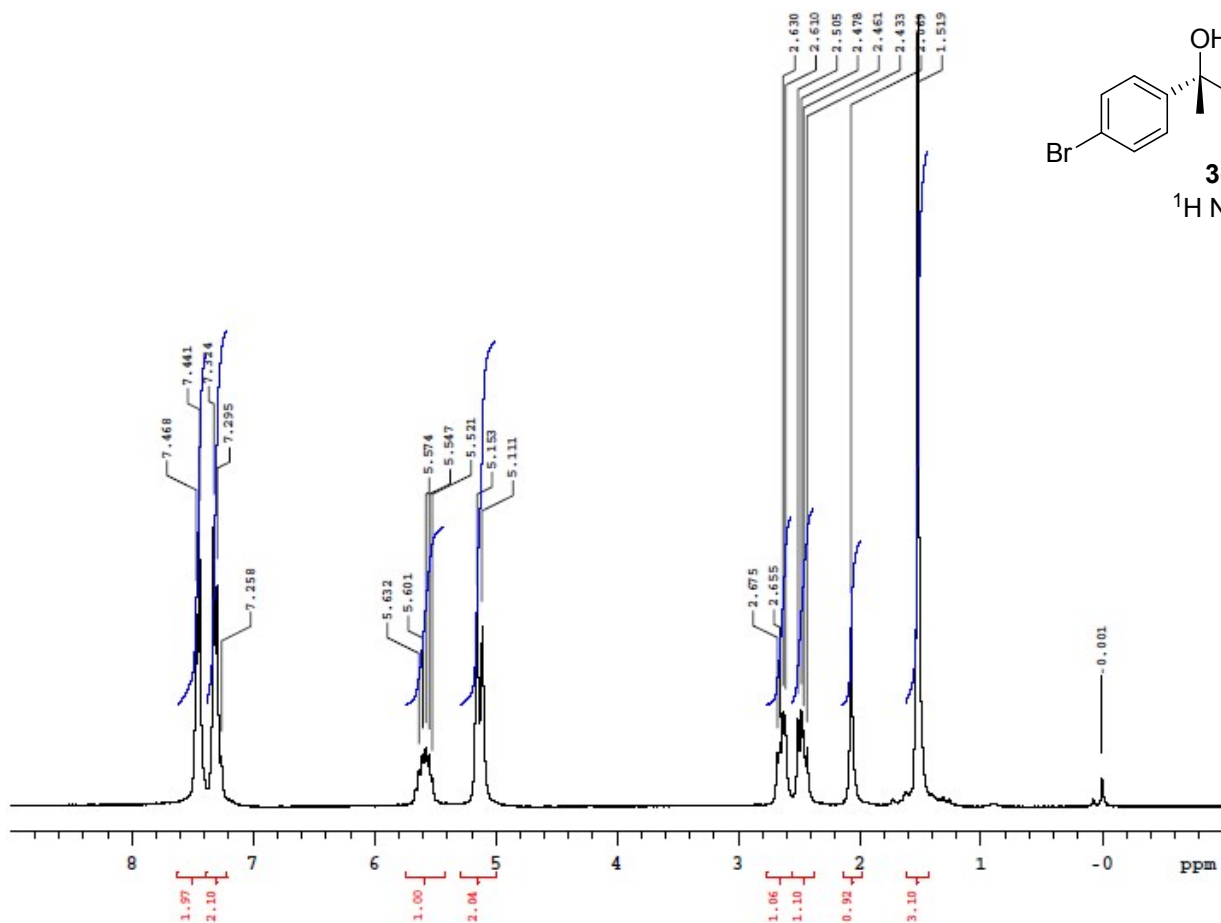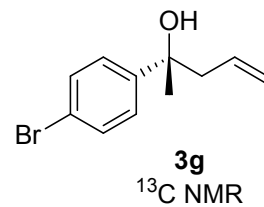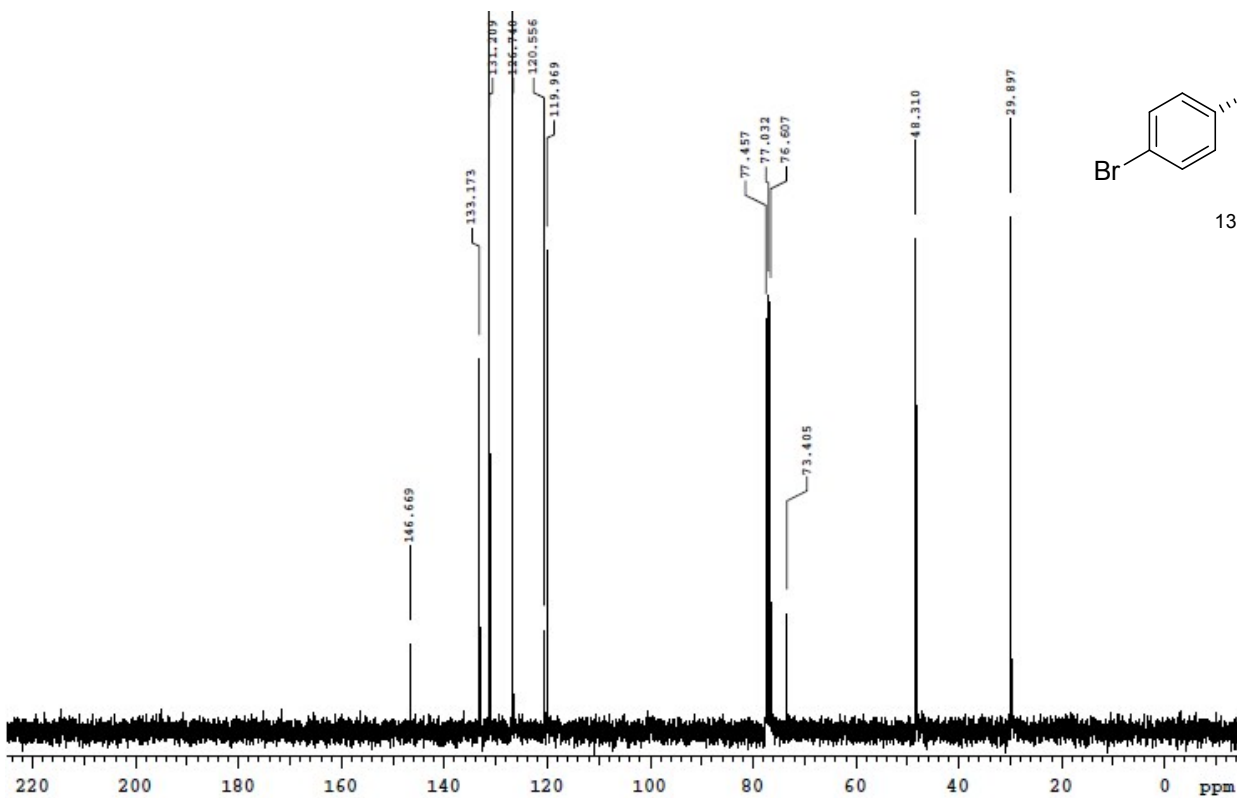

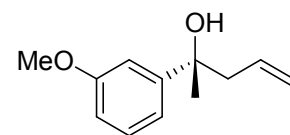

**3h**  
<sup>1</sup>H NMR

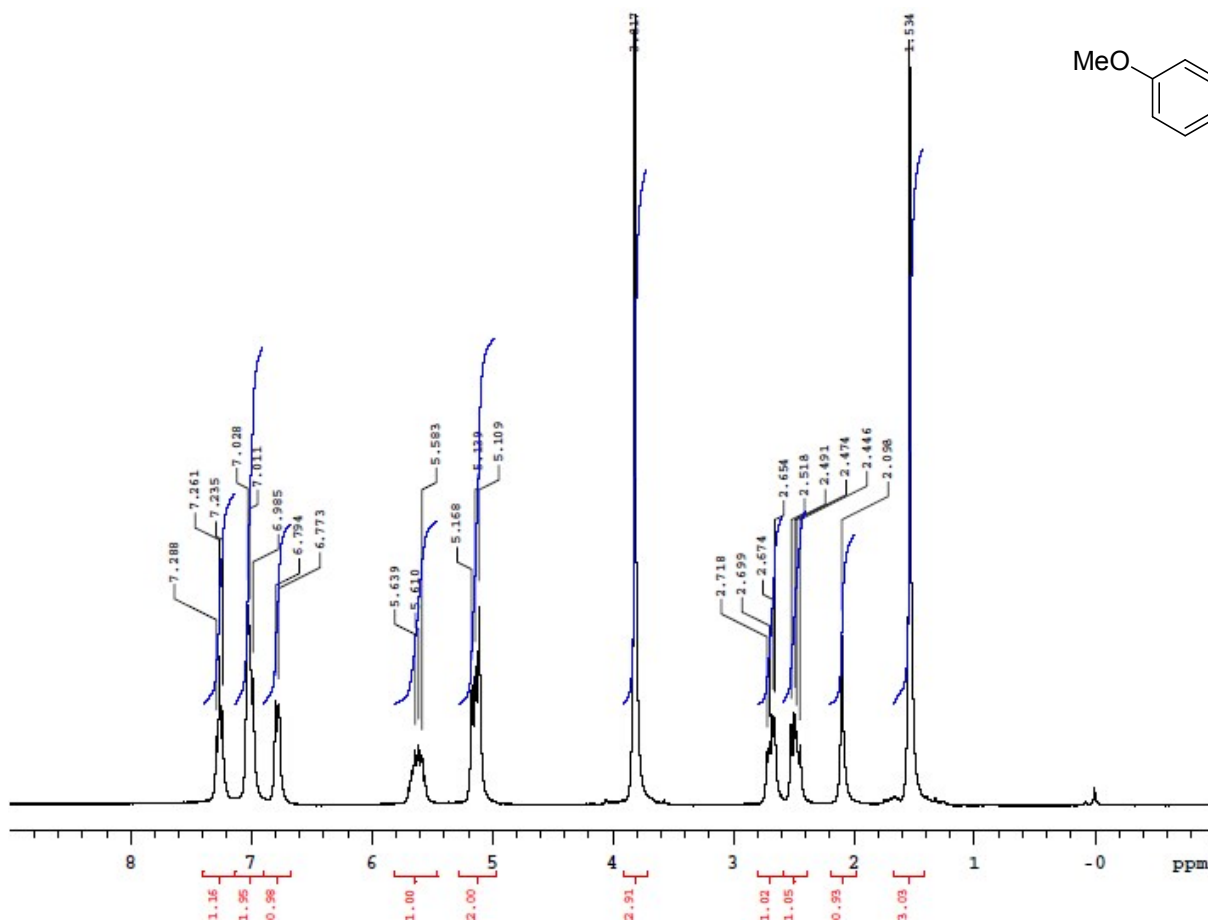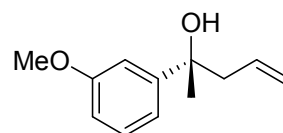

**3h**  
<sup>13</sup>C NMR

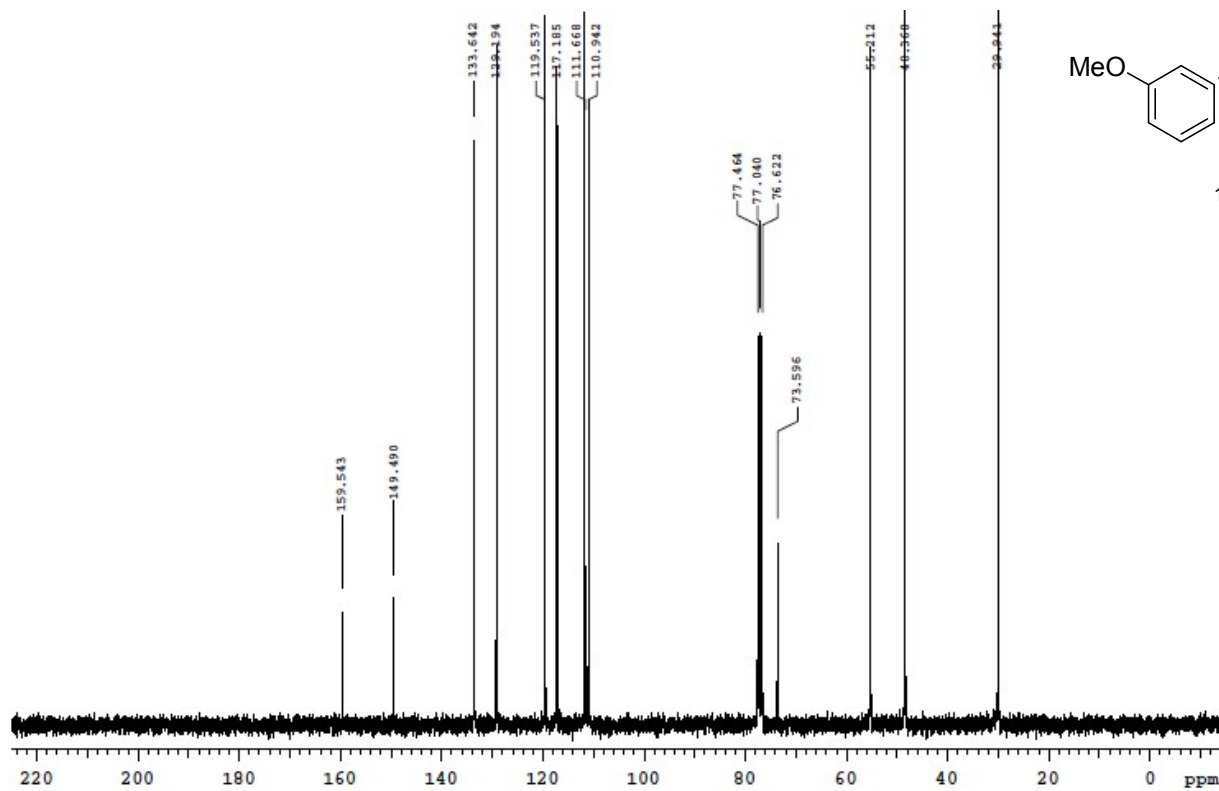

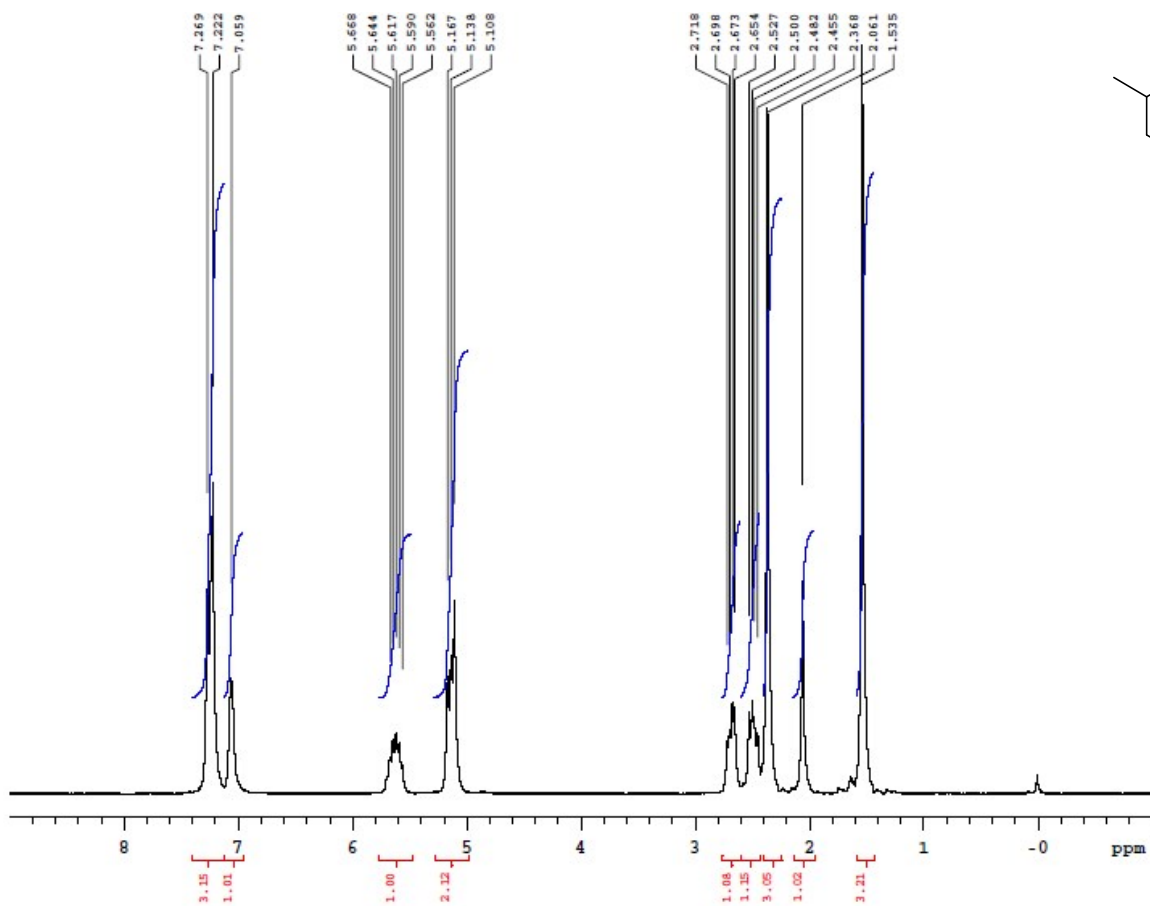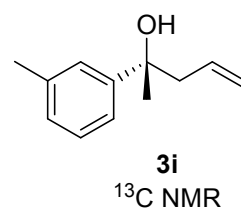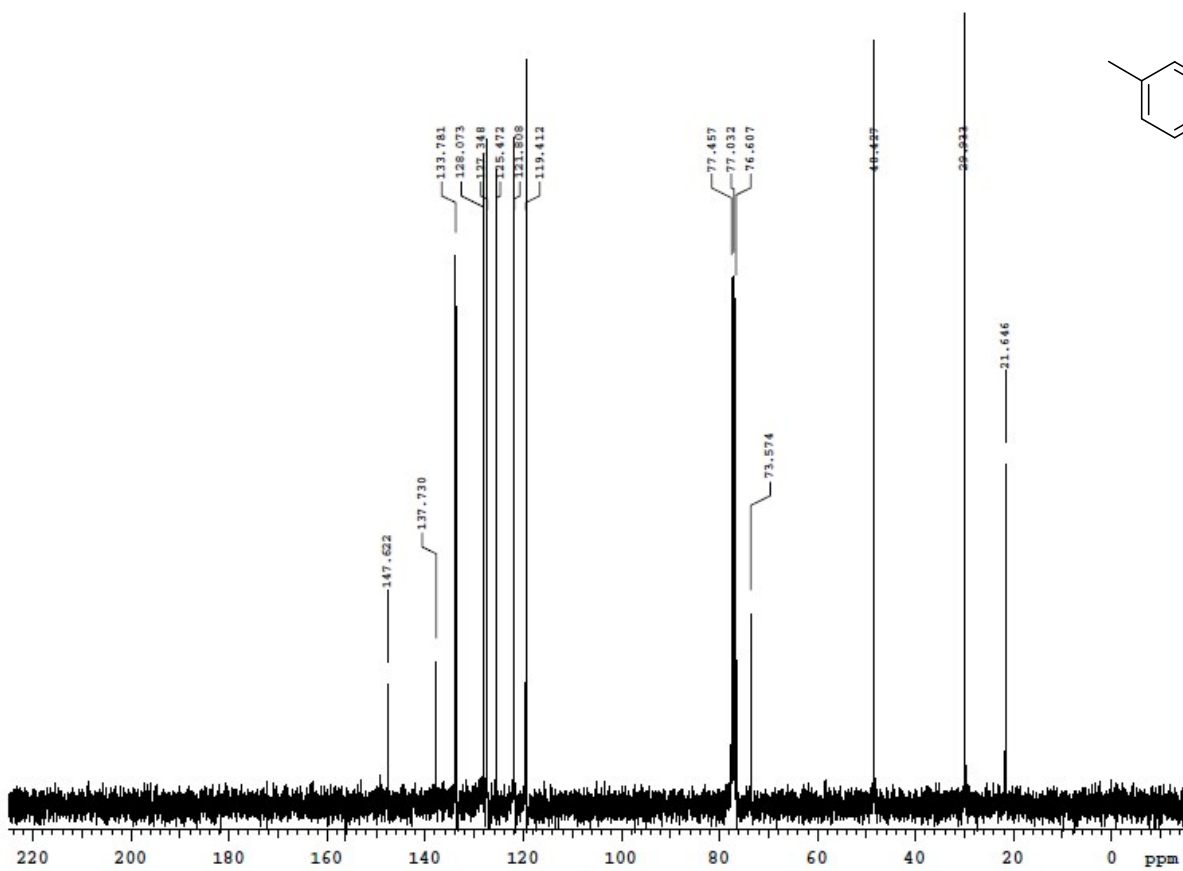

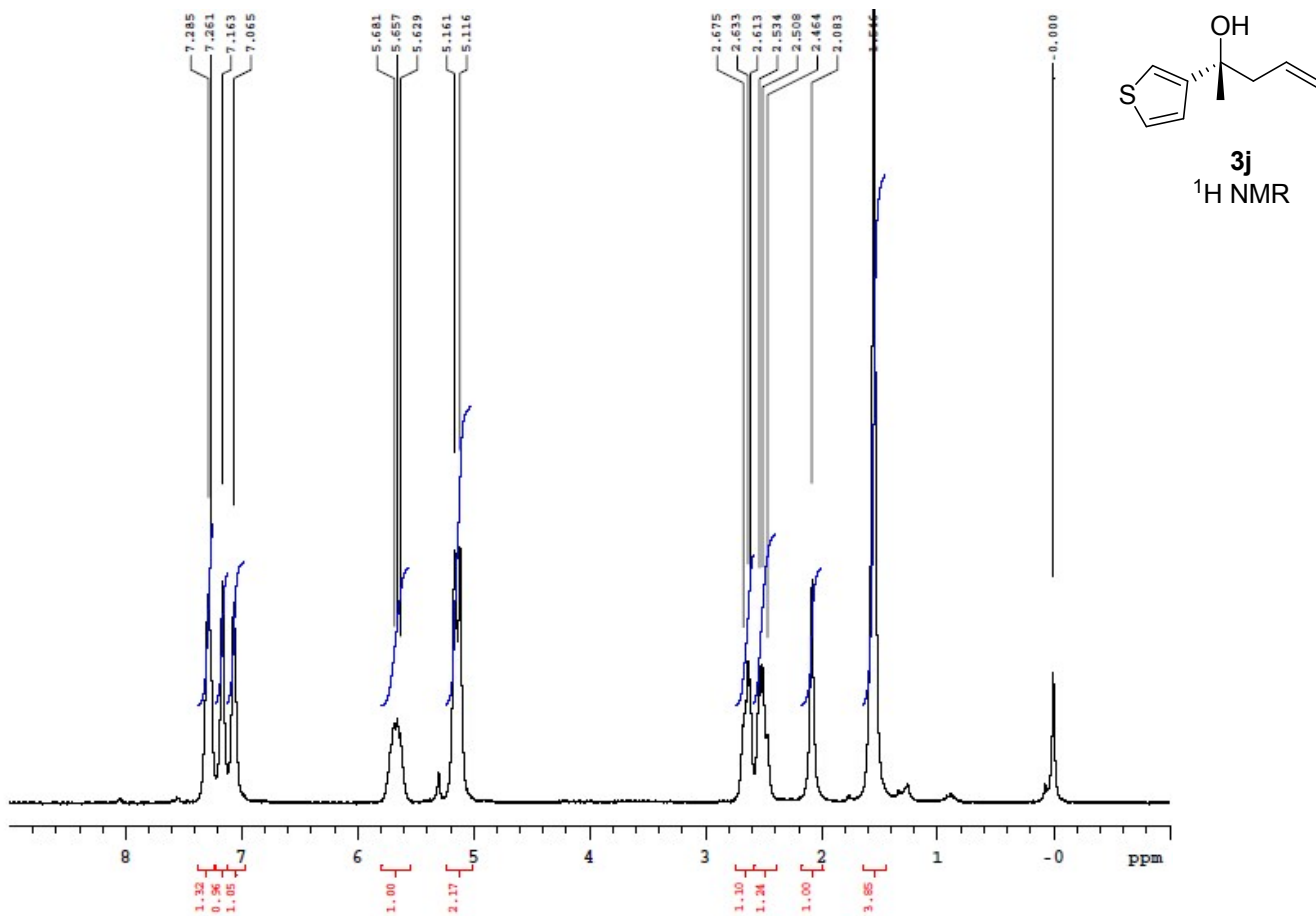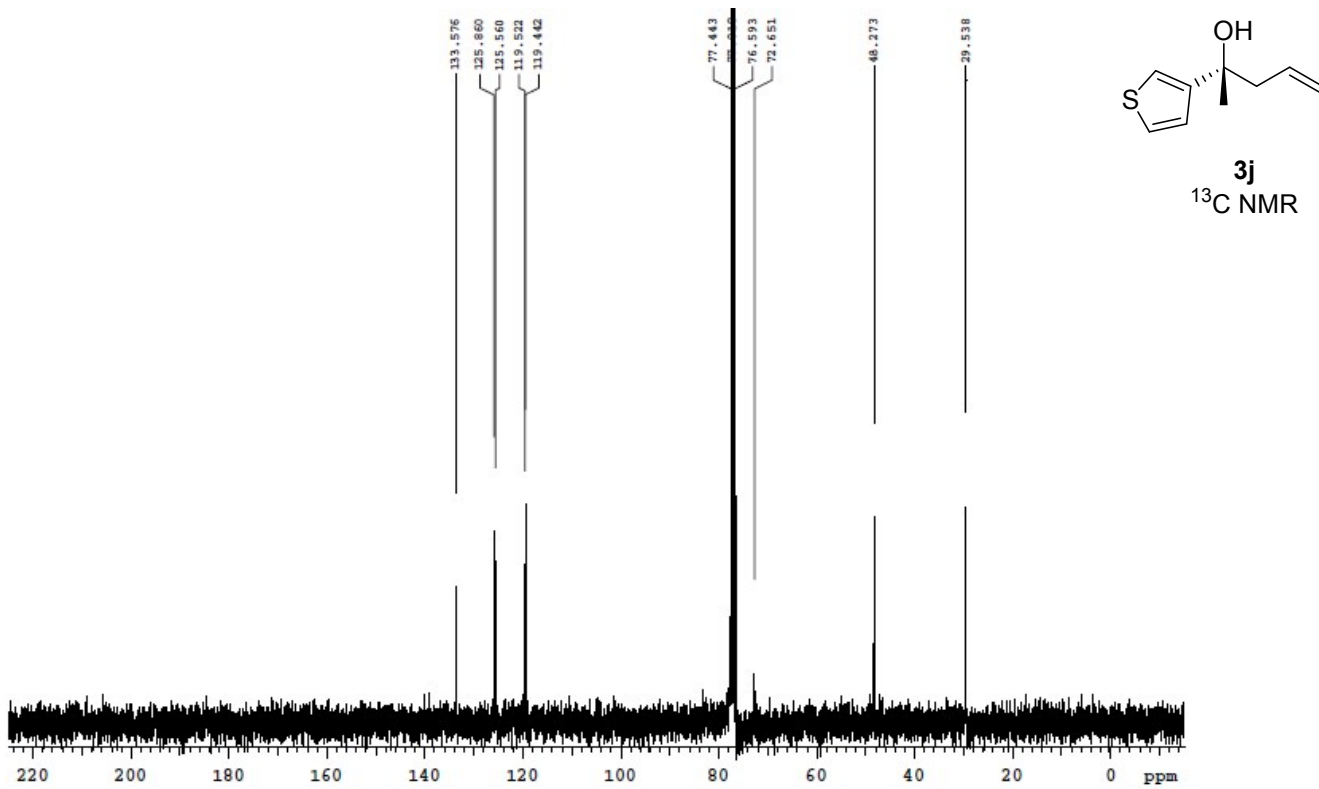

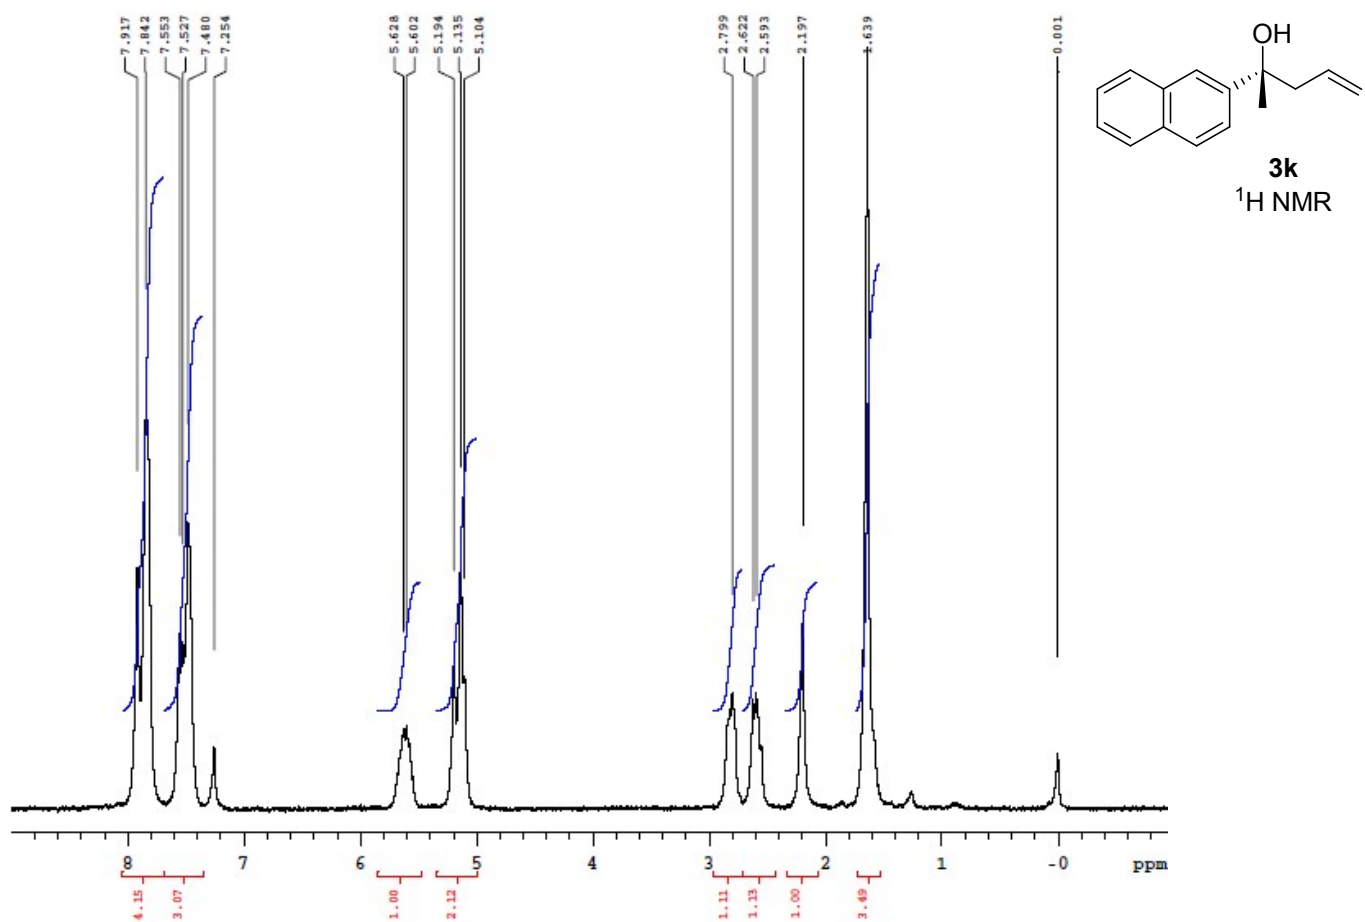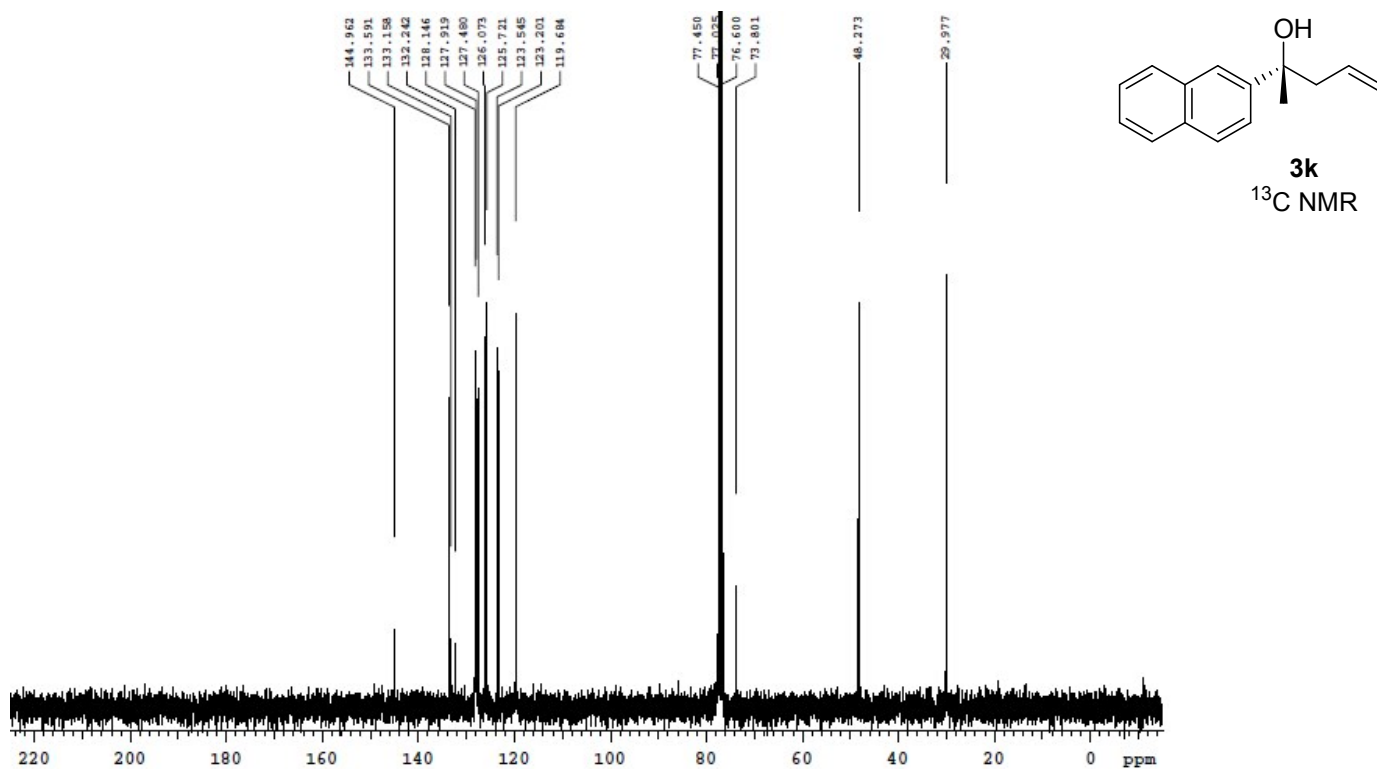



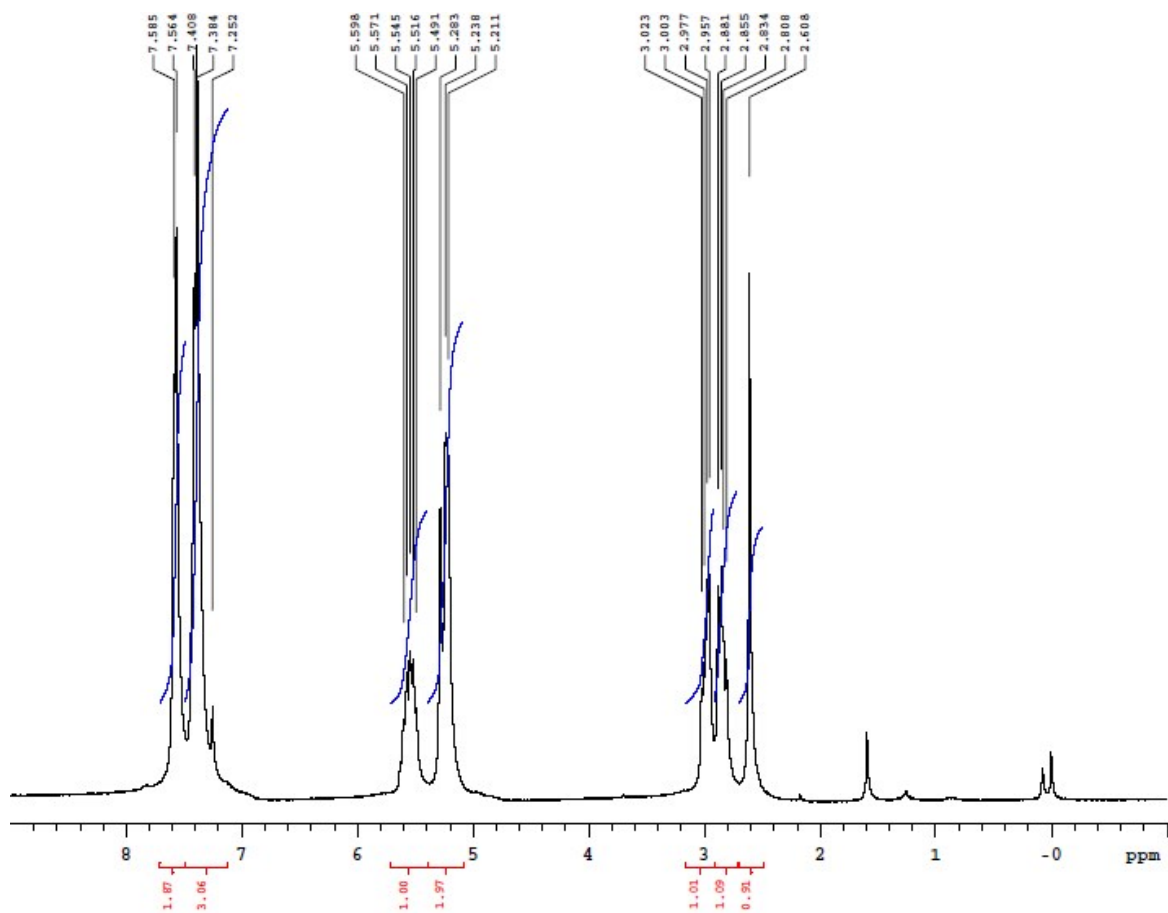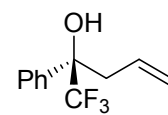

**3i**  
<sup>1</sup>H NMR

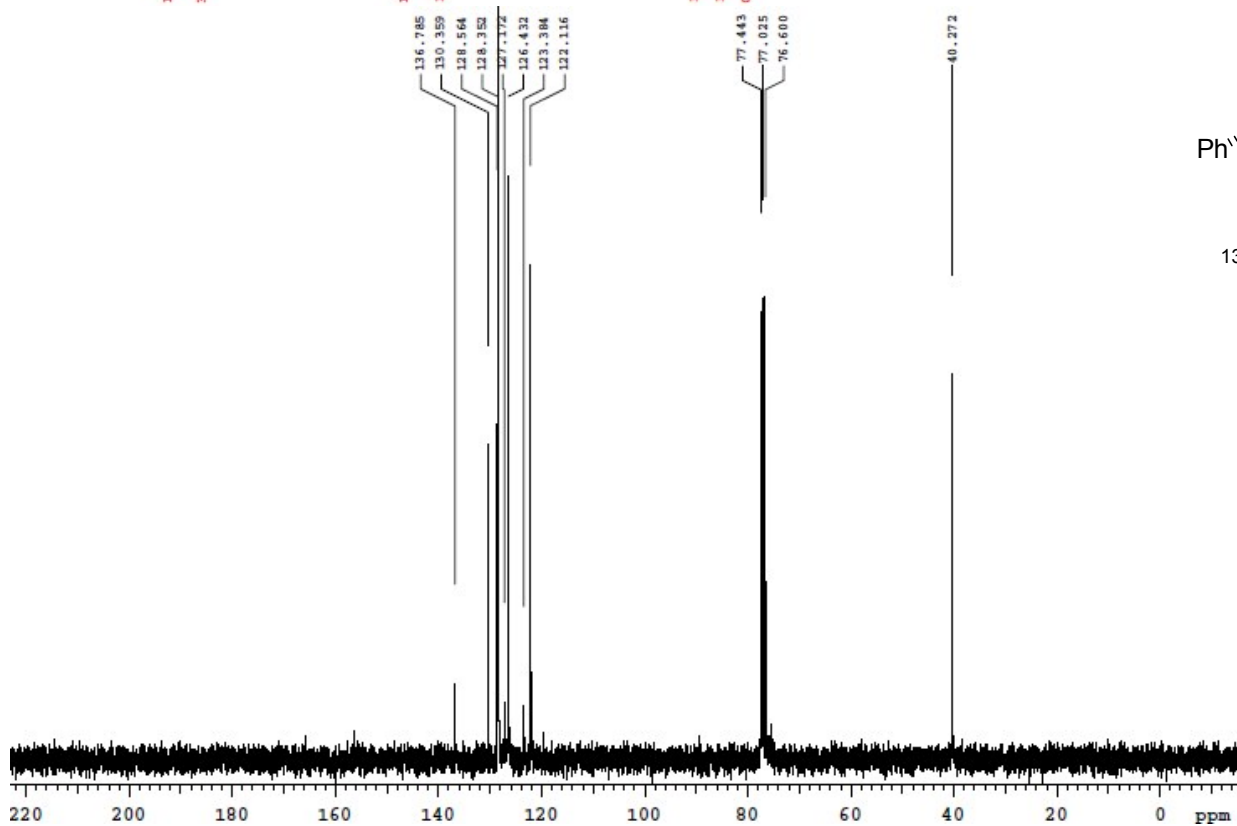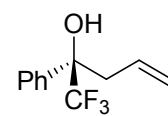

**3i**  
<sup>13</sup>C NMR

## HPLC analysis

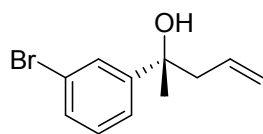

**3a-HPLC**  
 DAICEL CHIRALCEL OD-H  
 hexane:*i*PrOH = 97:3, 1.0 mL/min

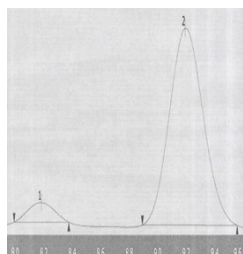

**(R)-3a**

| Peak | tR (min) | Area (%) |
|------|----------|----------|
| 1    | 8.2      | 7.1      |
| 2    | 9.2      | 92.9     |

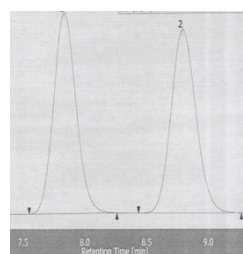

**Racemic-3a**

| Peak | tR (min) | Area (%) |
|------|----------|----------|
| 1    | 7.8      | 49.9     |
| 2    | 8.8      | 50.1     |

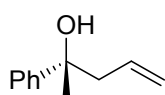

**3b-HPLC**  
 DAICEL CHIRALCEL OJ-H  
 hexane:*i*PrOH = 97:3, 1.0 mL/min

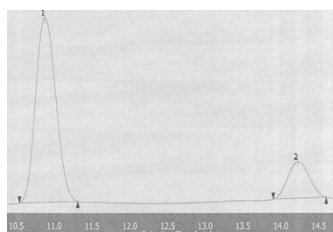

**(R)-3b**

| Peak | tR (min) | Area (%) |
|------|----------|----------|
| 1    | 10.9     | 82.8     |
| 2    | 14.2     | 17.2     |

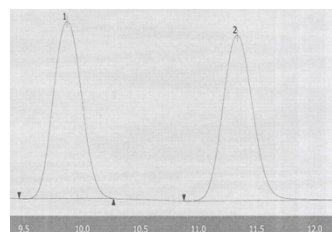

**Racemic-3b**

| Peak | tR (min) | Area (%) |
|------|----------|----------|
| 1    | 9.9      | 50.1     |
| 2    | 11.3     | 49.9     |

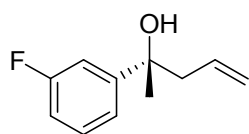

**3c-HPLC**  
 DAICEL CHIRALCELOJ-H  
 hexane:*i*PrOH = 97:3, 1.0 mL/min

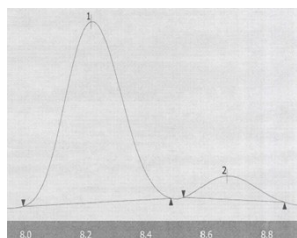

**(R)-3c**

| Peak | tR (min) | Area (%) |
|------|----------|----------|
| 1    | 8.2      | 90.1     |
| 2    | 8.6      | 9.9      |

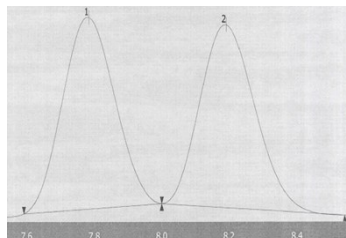

**Racemic-3c**

| Peak | tR (min) | Area (%) |
|------|----------|----------|
| 1    | 7.8      | 50.2     |
| 2    | 8.2      | 49.8     |

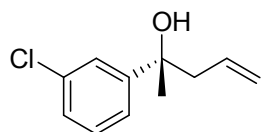

**3d-HPLC**  
 DAICEL CHIRALCEL OD-H  
 hexane:*i*PrOH = 97:3, 1.0 mL/min

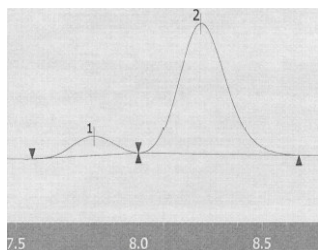

**(R)-3d**

| Peak | tR (min) | Area (%) |
|------|----------|----------|
| 1    | 7.8      | 10.9     |
| 2    | 8.3      | 89.1     |

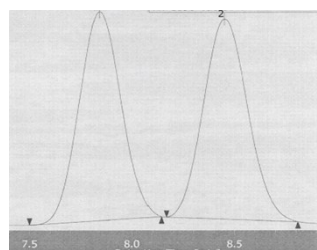

**Racemic-3d**

| Peak | tR (min) | Area (%) |
|------|----------|----------|
| 1    | 7.8      | 49.9     |
| 2    | 8.5      | 50.1     |

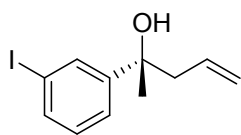

**3e-HPLC**  
 DAICEL CHIRALPAK AI  
 hexane:*i*PrOH = 97:3, 1.0 mL/min

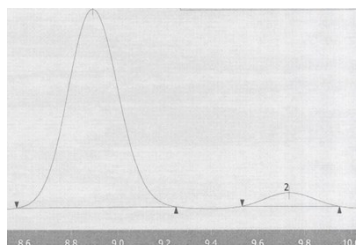

**(R)-3e**

| Peak | tR (min) | Area (%) |
|------|----------|----------|
| 1    | 8.9      | 94.3     |
| 2    | 9.7      | 5.7      |

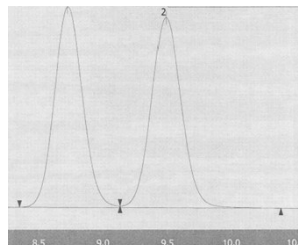

**Racemic-3e**

| Peak | tR (min) | Area (%) |
|------|----------|----------|
| 1    | 8.7      | 49.9     |
| 2    | 9.5      | 50.1     |

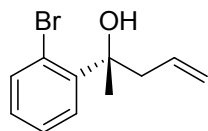

**3f-HPLC**  
 DAICEL CHIRALPAK AD-3  
 hexane:*i*PrOH = 97:3, 1.0 mL/min

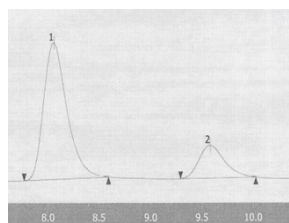

**(R)-3f**

| Peak | tR (min) | Area (%) |
|------|----------|----------|
| 1    | 8.1      | 79.2     |
| 2    | 9.6      | 20.8     |

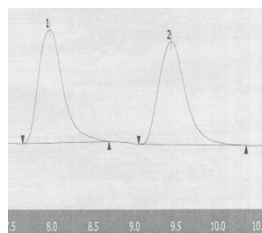

**Racemic-3f**

| Peak | tR (min) | Area (%) |
|------|----------|----------|
| 1    | 8.0      | 50.1     |
| 2    | 9.4      | 49.9     |

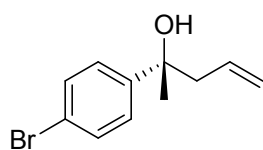

**3g-HPLC**  
 DAICEL CHIRALCEL OJ-H  
 hexane:*i*PrOH = 97:3, 1.0 mL/min

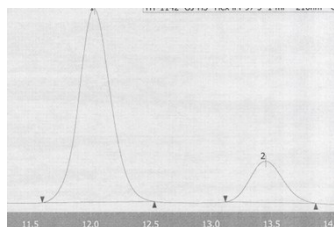

**(R)-3g**

| Peak | tR (min) | Area (%) |
|------|----------|----------|
| 1    | 12.0     | 82.2     |
| 2    | 13.5     | 17.8     |

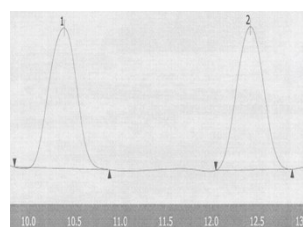

**Racemic-3g**

| Peak | tR (min) | Area (%) |
|------|----------|----------|
| 1    | 10.4     | 50.1     |
| 2    | 12.4     | 49.9     |

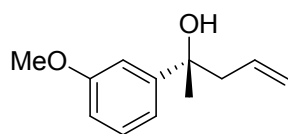

**3h-HPLC**  
 DAICEL CHIRALCEL OJ-H  
 hexane:*i*PrOH = 97:3, 1.0 mL/min

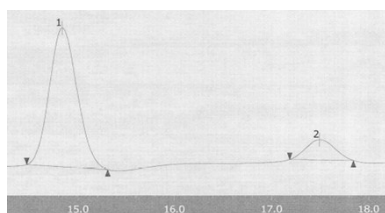

**(R)-3h**

| Peak | tR (min) | Area (%) |
|------|----------|----------|
| 1    | 14.8     | 87.0     |
| 2    | 17.5     | 13.0     |

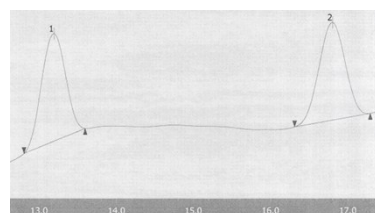

**Racemic-3h**

| Peak | tR (min) | Area (%) |
|------|----------|----------|
| 1    | 13.2     | 50.1     |
| 2    | 16.8     | 49.9     |

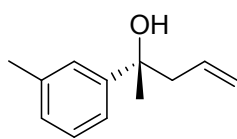

**3i-HPLC**  
 DAICEL CHIRALCEL OJ-H  
 hexane:*i*PrOH = 97:3, 1.0 mL/min

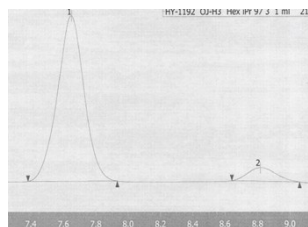

**(R)-3i**

| Peak | tR (min) | Area (%) |
|------|----------|----------|
| 1    | 7.7      | 92.0     |
| 2    | 8.8      | 8.0      |

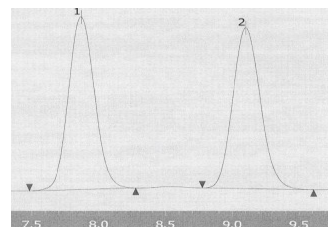

**Racemic-3i**

| Peak | tR (min) | Area (%) |
|------|----------|----------|
| 1    | 7.9      | 50.1     |
| 2    | 9.1      | 49.9     |

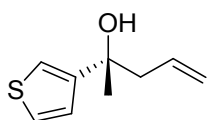

**3j-HPLC**  
 DAICEL CHIRALCEL OD-3  
 hexane:*i*PrOH = 99:1, 0.8 mL/min

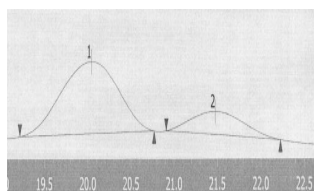

**(R)-3j**

| Peak | tR (min) | Area (%) |
|------|----------|----------|
| 1    | 20.0     | 77.3     |
| 2    | 21.5     | 22.7     |

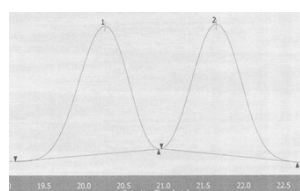

**Racemic-3j**

| Peak | tR (min) | Area (%) |
|------|----------|----------|
| 1    | 20.3     | 50.1     |
| 2    | 21.7     | 49.9     |

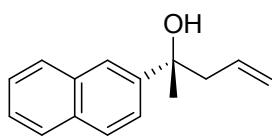

**3k-HPLC**  
 DAICEL CHIRALCEL OJ-H  
 hexane:*i*PrOH = 97:3, 1.0 mL/min

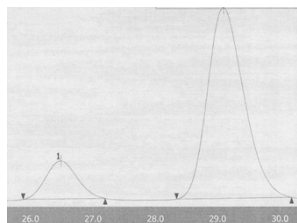

**(R)-3k**

| Peak | tR (min) | Area (%) |
|------|----------|----------|
| 1    | 26.5     | 14.6     |
| 2    | 29.1     | 85.4     |

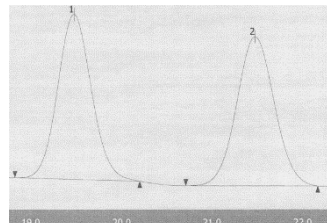

**Racemic-3k**

| Peak | tR (min) | Area (%) |
|------|----------|----------|
| 1    | 19.5     | 49.8     |
| 2    | 21.5     | 50.2     |

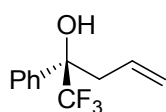

**3l-HPLC**  
 DAICEL CHIRALCEL OJ-H  
 hexane:*i*PrOH = 97:3, 1.0 mL/min

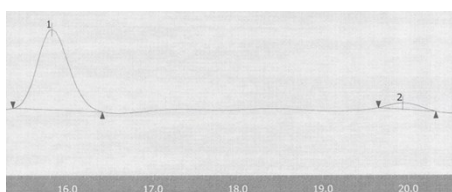

**(R)-3l**

| Peak | tR (min) | Area (%) |
|------|----------|----------|
| 1    | 15.8     | 93.2     |
| 2    | 19.9     | 6.8      |

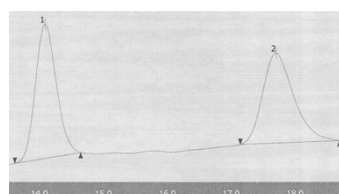

**Racemic-3l**

| Peak | tR (min) | Area (%) |
|------|----------|----------|
| 1    | 14.1     | 50.1     |
| 2    | 17.7     | 49.9     |
